# Supplementary material for: Myosin II isoforms play distinct roles in adherens junction biogenesis
Source: eLife. 2019 Sep 5;8:e46599. doi: 10.7554/eLife.46599 (PMC6756789; doi:10.7554/eLife.46599)
Supplement: Figure 1—figure supplement 1—source data 1. [file elife-46599-fig1-figsupp1-data1.xlsx]

## Sheet: Figure_1_supplementary_1_c
Figure_1_supplementary_1_c
Time	Initial Angle < 0									Initial Angle > or = 0
0	-64.5694	-85.7543	-64.1662	-87.7539	-37.3229	-66.4043	-33.7072	-48.391	-84.3322	24.7877	27.9114	56.3385	73.8482	83.7022	45.0228	52.6774	21.8125	0	88.5375
0.166667	-64.3916	-85.6447	-58.024	-75.4174	-40.8358	-84.8486	-66.8353	-14.0434	-45.0228	25.0296	32.292	57.558	76.4117	45.0228	84.6025	44.113	-26.5785	-6.71324	57.1237
0.333333	-51.3662	-71.0656	-52.8801	-79.4206	-45.0228	-26.5785	45.0228	0	0	48.0371	56.9175	45.0228	79.7356	82.4471	56.9175	46.9329	-23.2104	-14.751	40.7843
0.5	-51.8691	-67.7281	-56.3385	-77.0444	-46.8714	-45.0228	70.0524	21.8125	26.5785	23.2104	60.782	0	71.6013	71.6013	13.0012	19.2998	-7.12863	-10.0131	60.9763
0.666667	-42.532	-58.7661	-52.2797	-49.7889	-58.4221	-78.3504	57.558	41.0299	29.0693	40.2568	26.5785	0	67.7853	72.9342	-14.939	13.6339	-14.0434	-3.81601	88.3601
0.833333	-26.5785	-67.5548	-50.932	-45.0228	-73.6478	-87.9235	84.3322	72.1579	14.0434	41.2068	6.91473	6.01205	61.2202	42.7311	-55.0359	16.6292	-45.0228	4.76606	78.73
1	-22.6313	-54.4899	-30.9795	-28.3151	-42.2951	-23.9746	86.0985	81.5106	18.4443	55.7414	3.81601	11.3157	57.005	53.157	-25.2139	11.6953	-33.7072	0	67.0453
1.16667	3.69326	-49.5991	-37.2036	-41.6547	-18.4443	-6.0946	72.9342	86.3124	-14.0434	61.5883	-21.4586	-7.7691	40.6219	76.7984	-46.9988	12.2067	-26.5785	-33.7072	60.673
1.33333	-12.3453	0	-39.8258	-15.9535	-3.81601	0	85.958	81.1993	-58.024	60.2857	-36.8886	-2.20371	21.0482	80.1748	-45.0228	21.8125	-18.4443	-19.4499	51.8691
1.5	-12.387	-11.9822	-46.1467	-32.0216	-2.38715	64.4727	80.9508	84.8486	-85.6447	54.7165	-33.2486	-2.04645	15.9535	67.2004	-54.7165	40.6219	-36.8886	-21.0482	48.391
1.66667	-18.8627	0	-37.4952	-38.6794	-11.3157	73.6478	83.1994	84.6025	-82.917	55.8686	-32.8452	-13.0012	26.5785	38.3096	-37.5876	28.3151	0	-19.8089	39.4207
1.83333	-40.7843	-18.4443	-24.7877	-25.0296	9.78737	75.5038	70.8569	84.7284	-80.5785	38.6794	-23.0004	-15.9535	33.7072	30.6662	-28.0867	-35.2355	26.5785	-33.1953	35.9279
2	-46.2423	-15.9535	-19.8653	-17.1114	8.88516	79.5489	59.7739	78.9991	-65.2579	30.7511	-24.4564	-17.937	17.3628	39.0108	-23.2104	-39.0108	39.3093	-23.5105	23.818
2.16667	-52.3323	-26.5785	-18.4443	-17.5345	24.1578	71.6013	71.6013	82.6105		26.5785	-21.4586	-13.7678	26.5785	47.145	-36.8886	-42.2951	53.157	-17.7537	12.8815
2.33333	-53.157	-3.01432	-5.71349	-5.71349	16.1974	85.5294	70.8569	87.6078	-72.5112	22.6313	-12.1009	-11.3157	27.9114	68.2332	-42.532	-27.4884	71.6013	-26.5785	7.12863
2.5	-47.41	-8.97718	-37.3683	-3.94719	-4.97226	87.5548	70.0524	85.1787	-50.2199	32.9219	-5.53034	-8.13423	29.0693	78.73	-55.4358	-15.6502	82.917	-43.4739	3.99294
2.66667	-27.2691	-76.0023	-52.8801	7.59849	0	46.9988	80.5785	86.2296	-28.625	50.2199	1.91012	1.246	40.6219	87.9992	-75.568	15.9535	81.2951	-45.0228	3.99294
2.83333	-12.3453	-60.2857	-76.9471	8.7506	-14.751	81.6144	84.8486	84.8486	-56.3385	39.1935	7.59849	10.4428	31.6235	84.1365	-82.917	66.8353	81.9114	-42.2951	5.57502
3	20.9351	-69.4792	-65.466	5.19706	-21.2613	66.2841		83.4098	-18.4443	21.2613	8.97718	21.5822	63.4671	79.5489	-64.1662	80.5785	75.1067	-38.6794	-2.79412
3.16667	42.9764	-56.3385	-79.5011	-6.11861	-23.6414	21.5123	80.0326	87.4418	-32.0216	23.8508	54.4899	29.9141	72.9342	79.2559	-52.6213	79.4206	80.5785	-52.1514	-18.0133
3.33333	43.1743	-65.2579	-77.0444	-22.1207	-45.0228	59.4509	74.5137	88.681	-60.2857	30.0838	21.8125	28.4574	70.0524	80.0326	-36.3453	64.2116	73.6478	-31.6235	-29.0693
3.5	51.5459	-35.5557	-86.3124	-24.6894	-30.9795		71.6013	80.352	-65.5893	18.8343	-4.57624	40.2568	-14.751	56.3385	-40.7843		45.0228	-16.3978	-21.8125
3.66667	50.7363	-52.1514	-88.6478	-46.2423	-48.391	7.8573	71.6013	84.4706	-61.4207	11.8947	0	50.8521	-51.8691	38.6794	-35.1136	64.4727	26.5785	-21.8125	-22.3175
3.83333	60.7394	5.44309	-76.0023	-61.4207		10.7898	49.6606	86.7735	0	5.85898	26.5785	77.0444	-26.5785	33.7072	-33.0874	69.2283	17.5345	-20.5665	-10.1807
4	67.9982	12.1009	-60.4528	-61.2202	33.7072	16.2685	57.005	78.4061	51.8691	-5.04501	69.1806	79.2559	-22.6313	21.8125	-28.9411	57.0595	0	-9.46712	-3.01432
4.16667	67.5137	-11.3157	-45.8784	-82.917	32.0216	-14.0434	47.7505	86.95	59.0662	-27.4884	83.1309	60.9763	-78.73	73.3379	-27.1949	76.0023	-15.2629	9.87081	18.4443
4.33333	79.6029	-35.8558	-53.157	-69.8105	0	18.4443	42.532	87.2515	51.3662	-28.625	79.3271	64.2116	-38.3096	82.3457	-29.9141	79.8365	-76.0023	10.9596	46.1043
4.5	78.0635	-51.0349	-35.6945	-84.6025	-21.8125	3.36817	42.1105	87.3813	57.1237	-22.9437	81.1605	71.0104	-4.23854		-33.3576	76.7984		26.5785	62.273
4.66667	82.6895	-39.8258	-37.5232	-86.2296	-10.3101	63.4671	36.6527	87.1818	80.5785	-15.0761	76.905	59.7739	-12.271	87.6585	-46.9988	70.8569	-65.5893	43.6249	78.2182
4.83333	79.9158	-30.2718	-58.1635	-67.4143	-20.5665	34.2331	29.4908	77.3588		-27.9114	78.4061	48.8388	-16.5127	85.8586	-46.9329	64.8881	-61.4207	57.4099	78.73
5	78.73	-37.5876	-59.2673	-34.3978	-11.3157	18.4443	23.7615	84.1867	85.8071	-23.2104	69.4792	59.5647	-17.8878	85.6447	-50.625	52.6213	-48.8388	64.3226	88.6478

## Sheet: Figure_1_supplementary_1_d
Figure_1_supplementary_1_d
Ctrl_Angle (deg)	Y27_Angle (deg)
215	18
290	147
184	79
89	268
77	13
45	348
220	162
299	230
96	231
109	328
66	47
89	237
125	220
91	301
106	5
	197
	349
	196
	356
	37
	22
	118
