# Supplementary material for: Myosin II isoforms play distinct roles in adherens junction biogenesis
Source: eLife. 2019 Sep 5;8:e46599. doi: 10.7554/eLife.46599 (PMC6756789; doi:10.7554/eLife.46599)
Supplement: Figure 1—source data 1. [file elife-46599-fig1-data1.xlsx]

## Sheet: Fig1_e
Fig1_e
Time	Junction Length_Ctrl (um)													Junction Length_Y27 (um)
0	0.708	4.248	6.608	10.148	24.072	1.652	5.428	6.608	2.596	2.124	8.968	6.136	8.968	13.452	7.08	8.26	12.272	17.7	9.912	6.136	13.688	4.012	2.124	14.16	6.372
0.166667	6.136	5.428	11.092	15.812	25.724	8.968	8.496	17.464	13.452	14.868	14.16	8.26	22.42	24.544	22.656	4.484	12.272	26.668	13.452	9.44	18.172	16.52	21.712	16.756	9.912
0.333333	8.968	5.9	11.092	26.668	27.14	16.52	10.62	22.892	20.296	21.004	17.7	12.508	25.96	25.488	29.736	2.124	17.464	30.444	18.644	3.776	33.512	21.948	29.264	20.768	9.204
0.5	10.856	5.9	11.8	32.096	25.724	22.42	14.868	25.488	22.892	35.872	15.34	12.744	25.488	22.184	28.792	12.744	12.036	28.32	34.692	8.968	47.2	25.252	32.096	27.376	13.452
0.666667	11.092	6.608	11.8	41.064	26.904	33.276	16.756	29.972	23.128	59	13.452	15.104	22.42	16.048	29.028	19.116	5.428	17.228	27.376	15.34	49.324	21.476	34.22	26.668	15.812
0.833333	11.564	8.496	15.34	42.48	28.32	37.288	17.464	38.94	29.736	59.236	13.688	16.048	22.42	7.316	14.396	20.296	7.552	23.6	32.568	19.116	55.46	20.06	42.48	30.68	16.992
1	9.912	9.204	19.352	41.536	27.612	40.828	19.352	39.412	34.22	62.54	14.396	17.7	24.544	2.832	9.44	19.824	14.396	27.14	35.872	20.768	56.404	28.792	41.064	32.096	7.316
1.16667	10.62	8.968	26.432	37.288	28.32	42.48	20.768	41.3	37.76	69.62	13.924	18.644	24.544	4.012	6.608	17.936	23.836	23.6	32.568	18.88	61.124	29.736	40.828	19.352	22.892
1.33333	12.036	9.912	29.264	37.052	30.68	42.244	19.116	48.616	42.008	63.484	14.396	18.644	30.208	2.36	2.36	18.408	26.432	24.308	42.008	17.936	64.664	22.42	40.12	10.384	24.308
1.5	16.52	14.16	28.32	34.692	34.928	40.828	19.116	48.616	45.312	62.776	15.34	17.7	31.388			20.768	28.792	23.128	38.704	17.228	60.18	19.588	46.728	2.124	26.904
1.66667	29.5	16.992	28.32	34.456	38.232	39.412	20.768	50.976	47.436	61.596	15.104	17.7	34.928			19.588	20.532	30.208	26.668	32.096	66.08	26.432	43.424	2.36	28.32
1.83333	33.04	19.116	35.164	33.748	38.468	39.648	25.016	55.932	45.076	59.472	16.756	24.308	37.052			21.476	12.272	22.892	23.836	39.412	61.36	36.344	35.4	2.124	36.344
2	33.984	22.184	36.816	37.524	39.884	40.828	26.432	58.056	45.312	57.112	22.184	26.668	41.064			22.892	8.732	21.948	30.208	39.176	56.404	35.636	30.444	2.36	40.12
2.16667	34.928	23.836	35.4	38.94	40.12	39.884	28.792	59.708	49.56	42.48	26.904	29.028	48.144			28.084	8.26	23.128	25.488	39.648	42.952	25.724	25.724	2.596	29.264
2.33333	33.04	27.14	32.096	40.356	40.828	37.524	31.86	60.18	50.74	41.536	26.432	31.152	52.864			34.456	4.012	20.768	38.704	55.224	31.86	25.724	29.5	2.124	29.264
2.5	34.692	30.444	32.568	40.356	42.48	35.164	35.164	63.248	50.74	39.412	26.668	38.232	58.056			32.332	3.776	19.116	33.512	53.572	20.768	25.016		1.888	19.352
2.66667	33.276	33.276	36.108	39.884	43.66	32.332	40.12	62.304	53.1	36.58	27.612	40.356	63.72			29.028	2.596	8.024		39.884	20.06	20.532		1.652	18.408
2.83333	33.748	39.176	34.456	40.12	47.436	31.152	42.48	63.248	53.336	39.648	27.848	39.884	65.136			27.14	2.596	11.092		44.368		21.24		3.304	22.184
3	37.288	42.952	33.276	40.12	47.908	25.724	44.84	63.956	54.28	40.356	28.084	39.884	63.72			28.792	2.596	19.824		42.48		23.128			26.668
3.16667	38.232	42.952	32.332	37.524	47.436	21.476	45.076	66.788	55.932	39.412	28.32	42.244	59.708			12.744		16.52		37.524		28.792			25.488
3.33333	38.704	43.188	31.152	36.58	47.436	18.88	43.66	68.676	54.516	40.356	24.544	38.468	49.088			9.676		25.724		41.3		24.072			24.78
3.5	41.064	43.424	28.792	35.164	48.144	13.924	45.312	63.484	53.808	41.536	24.308	40.828	42.008			6.372		20.532		19.588		8.732			30.444
3.66667	42.48	44.368	25.724	35.4	47.2	14.16	46.492	62.54	53.572	44.132	21.24	43.66	38.232					23.836		13.924		8.968			29.264
3.83333	44.604	46.256	25.488	34.928	42.48	16.048	45.784	64.192	54.28	49.088	18.408	45.548	36.58					22.656				4.72			34.692
4	45.076	47.436	24.072	34.928	40.356	15.812	45.784	57.82	55.224	53.1	18.172	49.796	36.58					23.6				4.484			29.264

## Sheet: Fig1_f
Fig1_f
Ctrl	Y27
100	38.5
100	50
71.4
