# Supplementary material for: Myosin II isoforms play distinct roles in adherens junction biogenesis
Source: eLife. 2019 Sep 5;8:e46599. doi: 10.7554/eLife.46599 (PMC6756789; doi:10.7554/eLife.46599)
Supplement: Figure 2—source data 1. [file elife-46599-fig2-data1.xlsx]

## Sheet: Fig2_a
Fig2_a
ctrl	NMIIA KD	NMIIB KD
1	0.108	1.38
1	0.105	0.924
1	0.411	0.926
1	0.436	0.844

## Sheet: Fig2_b
Fig2_b
ctrl	NMIIA KD	NMIIB KD
1	0.931	0.519
1	0.902	0.369
1	0.859	0.3247
1	0.886684	0.503174

## Sheet: Fig2_d
Fig2_d
Ctrl	NMIIA KD	NMIIB KD
93.3	57.1	93.3
100	28.6	100
100	56.3	77.8

## Sheet: Fig2_e
Fig2_e
Time	Junction Length_Ctrl (um)																																								Junction Length_NMIIA KD (um)
0	6.84832	7.37984	7.7184	13.0634	5.1904	9.18112	14.5334	3.74656	15.1722	11.1213	8.58784	4.78528	13.8781	7.78592	6.80224	3.8944	4.30528	5.5056	7.8048	1.92	3.01888	1.03712	4.35232	4.40928	6.67808	2.9504	5.58848	6.72768	4.94528	3.15252	3.59758	8.94431	6.80377	2.91325	3.97848	1.74801	1.9434	2.21872	6.11789	1.84257	19.0483	16.1402	9.06176	18.5107	6.21312	17.8141	15.6698	29.433	2.8976
0.166667	12.8	12.0458	15.2432	17.1082	14.8547	12.4253	14.7469	5.77152	24.6166	9.9136	18.0432	2.8976	14.2314	13.6077	12.7226	7.45504	8.19552	7.02528	11.9821	7.10528	5.59776	2.46176	3.95808	5.07936	10.8688	2.86208	5.76896	10.0467	5.32576	4.57454	11.3078	11.2551	11.6105	8.86717	7.55773	9.57673	7.99857	7.55587	9.89016	4.82668	12.8614	12.0106	12.7571	17.5421	10.24	32.4426	4.07296	39.9418	3.5344
0.333333	17.2362	10.2048	18.9606	22.6195	18.5677	15.8048	20.7216	8.47744	29.4358	5.68448	25.9702	2.88	15.6541	18.6656	16.3994	9.34752	9.31488	5.1696	19.0349	9.3184	8.70496	2.50464	2.63872	2.30752	20.8419	4.96768	7.73312	13.6067	8.00416	5.08779	18.761	14.5748	14.0707	23.6972	3.75919	17.4482	20.4641	6.58098	12.1099	15.175	10.6557	31.0515	2.3296	17.551	12.6877	25.0051		35.5629	3.5344
0.5	21.2899	14.5098	20.2554	26.7542	19.8896	16.9997	24.6003	13.4502	27.9507	7.82688	32.2445	2.56	19.4477	23.8797	15.1558	9.33824	13.3709	11.591	28.4333	10.3379	10.8282	3.16576	4.04768	1.35776	18.129	9.17184	11.1645	17.4259	10.2646	11.6629	32.5306	19.3614	18.7752	33.0263	4.34557	21.3043	20.9966	13.0017	5.8917	27.6801	25.6531	27.775	3.84	17.3891	14.4336	17.9981			2.9504
0.666667	20.4157	20.2429	26.425	22.4067	21.6186	18.52	25.521	23.4067	32.9142	8.1456	25.873	2.9504	12.6035	24.9315	15.7366	9.11104	16.0403	16.5693	40.8067	8.87808	13.4438	2.94784	4.52928	1.81024	8.6176	11.3181	8.66976	16.6394	9.54688	10.2643	34.1853	18.4663	17.7156	33.5453	5.26412	28.5668	25.1525	14.4117	24.783	38.8929	17.9462	23.8336		15.2202	14.4758	20.7779			4.58176
0.833333	13.8454	22.4301	32.7974	30.3037	23.2829	19.775	26.545	23.8803	27.864	6.6128	33.9872	4.87488	6.62752	23.4816	12.3386	9.98752	16.3664	18.9322	42.089	8.70688	12.6733	2.92256	5.31392	2.95776	10.0774	11.6093	9.95584	17.4675	12.177	10.0219	33.7424	24.0861	21.0607	36.4143	15.2932	27.4414	29.4948	13.9514	30.4679	42.356	16.3917	23.2365		9.38656	11.4429	14.3158			2.86208
1	19.1622	23.8275	31.4618	28.5034	28.7219	20.5578	29.8445	22.0784	12.2	4.75936	29.2106	2.86208	7.504	21.7514	12.473	13.8352	16.3706	19.0762	43.3974	10.3683	13.8672	3.2928	6.81696	5.9856	28.1123	14.3485	10.6944	20.1181	13.535	9.61381	36.7936	27.0662	22.3653	36.5444	15.3959	30.8538	38.0214	17.4632	31.8624	52.2084	18.9616	27.9334			8.63104	15.1373			3.95808
1.16667	24.2851	23.0429	40.159	29.1056	26.8822	19.3008	28.8198	13.3974	13.9018	10.3165	33.144	9.7376	5.95616	21.6931	10.5088	17.6147	16.5971	14.9411	42.4352	11.2314	14.528	2.82208	5.48128	2.30752		13.6358	10.0477	19.7814	14.3472	3.88681	38.0361	20.7062	23.0115	40.0899	12.992	26.3128	45.5905	16.4505	32.923	51.4992	13.04	24.9056			6.21888	8.3904			5.76896
1.33333	12.5955	20.928	45.0768	35.2163	30.0518	17.6941	30.5162	12.5776	3.77216	13.6451	39.5958	17.1174	9.34176	22.6314	5.16		15.735	14.9875	42.4019	9.64128	18.0992	4.0544	5.89792	5.98592		11.5619	10.0074	18.9309	15.4874	3.09	35.7227	34.6298	21.4978	55.6382	18.6318	24.891	46.3347	33.5562	27.1206	49.3358	6.72768	20.4016			6.18016	19.8118			3.64864
1.5	10.9251	22.5088	48.377	38.5382	33.984	18.2816	24.3782	12.1974	4.48608	13.0333	25.0182	28.0819	19.0243	25.5149	3.15168		13.1344	16.2502	43.0218	11.9104	16.207	4.55776	7.02208	7.66528		15.9123	8.28	20.2851	15.4742	3.9998	34.2229	36.7652	19.7348	29.9028	21.9589	25.1632	45.6999	43.5347	29.7702	47.2563	5.44928	21.4211			4.75712	20.368
1.66667	9.82336	23.5997	46.5299	41.8336	31.9152	18.5878	26.6003	11.8838	5.16544	13.9821	23.1478	26.5546	20.6269	24.6986			15.3366	10	37.4998	10.7782	16.5827	5.44416	6.69568	9.62816		22.0755	8.67968	19.5808	14.8877	7.77506	30.6545	47.5515	24.7661	36.4183	20.385	20.6356	42.324	30.3405	38.848	63.5779	3.73184	21.2819			3.46144	14.8803
1.83333	11.9046	31.4771	49.8406	33.871	30.6656	18.6154	31.2864	11.5152	8.02336	15.9501	31.0378	21.0909	28.1405	25.6102			15.3696	6.84096	24.2637	11.5648	17.3962	4.81984	6.848	9.33152		20.4806	8.42528	22.2963	14.0477	20.2244	33.5978	42.7063	23.9131	28.7969	31.0435	24.1011	41.5625	18.2382	33.9467	55.7166	20.4717				3.89312	16.9856
2	9.096	28.807	48.3773	38.9222	35.0624	15.871	33.0838	11.2003	13.7901	23.3392	26.8029	28.048	15.0218	27.8781			17.0262		20.6061	13.0288	19.5834	4.14016	6.81632	10.0573		17.8032	8.1584	22.313	14.3059	33.9439	47.6854	35.3396	26.7789	29.5864	33.3842	27.447	40.8511	32.8028	40.69	49.904	23.9043				4.0096	12.9216
2.16667	5.20928	26.4	52.216	33.9232	35.575	18.2787	36.3472	10.4451	19.4842	21.2621	31.4426	27.3699	21.9782	29.8374			15.5837			12.9763	19.6435	3.28064	5.76	13.7878		20.1894	8.06912	23.799	15.9766	34.3282	44.5705	39.3678	26.474	32.0659	34.8982	33.255	41.9689	28.3267	48.7636	51.2646	17.5142				4.8	21.4205
2.33333	18.1162	27.3267	51.52	40.7862	43.2851	19.1872	42.8922	10.6282	18.7658	27.1939	29.9504	21.7082	31.9376	25.2611			16.0646			13.3184	21.3238	3.62784	7.25952	16.0451		19.0006	9.41312	22.6784	24.5882	33.0732	48.5886	40.277	27.2027	33.3431	29.6575	32.6851	44.028	27.1195	49.1611	38.9326	23.072				3.7456	26.3968
2.5	17.152	30.0048	49.9293	41.0931	48.6214	17.8221	45.1398	10.0077	25.3523	27.656	27.9366	17.3856	25.3891	25.6067			15.1098			13.5232	24.5965	3.67552	18.5914	11.6195		15.4941	7.97312		27.5296	24.5191	40.2481	32.1661	25.1459	28.7821	29.1506	40.9222	43.2824	23.4652	42.0596	34.6375	5.87456				4.52544	21.967
2.66667	17.4246	27.7542	51.399	37.4707	50.4938	14.1446	46.615	11.1581	26.0573	27.5475	30.5482	21.0688	24.9453	20.7299			14.0573			13.5334	29.7398	3.8432	18.9178	12.0138		16.2534	6.66144		29.8106	24.8935	48.5411	45.354	26.0013	33.9986	29.3777	39.855	44.0622	18.3537	36.9406	32.4229	11.696				9.86976	25.6627
2.83333	16.3168	28.032	49.7466	42.3066	52.7917	13.5984	48.4576	7.40096	25.5568	25.2368	29.2496	14.8707	18.2045	23.4694			17.5494			14.0842	26.3466	3.87328	14.8938	9.48192		22.7395	8.85536		32.1549	24.5369	50.1619	57.9494	24.2912	27.2323	29.933	31.1501	45.871	24.0381	46.9113	30.3856	9.16352				12.7139	13.3491
3	16.3789	25.8275	46.1494	35.0051	59.423	15.2464	48.3258	8.45184	21.0704	27.0547	24.1344	15.4842	28.7546	22.5642			15.9053			12.9488	27.2032	4.28416	18.7046	11.6998		21.6835	9.65216		35.5862	19.2464	45.5411	53.7439	25.4022	28.2879	27.0573	35.649	49.4947	21.0168	49.1059	28.5653	5.16				11.3408	16.2016
3.16667	18.6163	26.967	43.5933	38.1702	56.2378	17.288	48.8186	12.145	22.4986	26.7882	29.2189	15.7686	21.9424	25.4595			16.4509			13.5856	28.1235	4.20352	21.9322	13.0832		18.9872	9.31392			16.1233	48.4114	43.4101	25.869	36.3162	24.6834	30.9791	51.3952	30.1763	49.6885	26.5399	5.76				9.09344	34.1536
3.33333	13.6442	29.9642	41.6102	20.8509	42.6013	10.8899	55.2714	11.5555	30.9811	23.7718	29.9386	12.328	27.72	25.5619			15.8189			16.1978	27.2838	4.3456	20.1891	13.5821		21.431	10.9309			17.0252	58.0286	44.5533	23.5824	47.9051	33.5139	35.4088	51.5672	28.1682	47.9402	30.6945	7.06912				14.9562	15.5347
3.5	9.58944	29.6189	46.4384	18.7126	38.8342	9.37728	49.1491	15.4829	39.0781	26.2608	27.9229	15.8259	29.7242	27.241			15.8746			19.3382	29.3984	3.7232	23.2806	14.4768		22.0112	10.0294			19.4563	40.0128	41.2186	27.2159	35.8437	39.3999	39.0301	54.2228	38.844	51.4612	32.742	10.8854				9.23008	33.8166
3.66667	10.6566	33.4003	44.0394	18.1872	30.1347	8.36576	54.3219	11.2733	30.2346	30.4816	17.9472	16.2768	28.3251	28.0448			17.5376			21.6352	29.2378	2.91936	19.3491	13.1414		17.4096	9.77216			20.1609	30.7076	39.3565	27.9385	36.9574	39.8003	36.0334	52.8471	40.5101	54.3291	39.3614	4.96768				8.9184	31.5827
3.83333	24.151	30.8438	27.7802	20.7997	20.3037	8.74944	63.1734	7.70688	26.7392	27.3434	21.0541	15.5232	26.329	27.4182			20.1581			24.4883	30.2883	3.61696	20.8422	9.87264		17.233	11.2682			21.7004	43.6357	47.5911	28.1686	27.8229	44.9515	34.7773	51.2683	41.235	55.061	31.9088	2.43712				9.424	29.6595
4	30.313	33.6618	30.4518	16.1328	15.0173	14.4976	56.2294		28.1475	26.4019	26.0618	18.5795	27.16	28.9933			23.0678			23.953	30.9779	5.08544	15.8198	4.17344		18.6131	10.2858			25.9831	28.8299	48.9038	28.9753	29.8176	42.8521	36.0772	50.3877	41.1027	43.8372	40.1837	2.024				8.48896	31.3869
[truncated: 69 more columns]

## Sheet: Fig2_f
Fig2_f
Ctrl	NMIIA KD	NMIIB KD
22.0285	9.76284	31.8353
30.2326	9.76284	13.9211
36.1765	8.62116	28.8762
30.2599	25.3005	16.1486
32.0225	30.1804	49.7899
12.3779	15.3623	16.3804
52.2625	19.0086	28.6966
10.6468	26.8466	2.6537
25.7747	18.1261	41.3972
25.2479	2.24	32.8639
24.5958	5.44	20.9307
21.5226	22.3462	20.1275
26.1259	22.1591	8.2064
25.9235	28.1863	45.095
14.0573	17.5186	11.4531
13.5334	20.8189	25.0848
29.7398	20.7615	31.5232
3.8432	2.12087	24.2518
18.9178	13.9122	35.9683
12.0138	46.2859	24.816
16.2534	25.7237	16.5843
6.66144		3.4
29.8106		32.3
24.5369		30.7
50.1619		23.5
57.9494		27.3
24.2912		40.5
27.2323		14.7
29.933
31.1501
45.871
24.0381
46.9113
30.3856

## Sheet: Fig2_g
Fig2_g
Ctrl	NMIIA KD	NMIIB KD
0.937348	0.877563	0.791693
0.923702	0.844338	0.839154
0.846292	0.656733	0.839889
0.943076	0.901819	0.779903
0.831844	0.907342	0.931643
0.879593	0.950923	0.936016
0.882009	0.942738	0.88369
0.901384	0.872692	0.89526
0.861547	0.969152	0.855749
0.894017	0.703591	0.908687
0.98607	0.88728	0.630675
1	0.927876	0.570715
	0.905731	0.766074
	0.985997	0.789596
	0.942904	0.975524
		0.806126
		0.897851

## Sheet: Fig2_h
Fig2_h
Ctrl	NMIIA KD	NMIIB KD
11	58	136
10	63	25
14	58	14
92	40	180
65	59	119
13.015	53.647	7
42.571	1.661	166
53.13	24.014	68
4.79	7.944	2
59.612	22.233	85
7.839	33.69	172
148	8.881	33
37.989	6.33	35
1.79	109	36
8.13	2.011	22
6.75	93.968	5
15.202	48.525	84
13.235	6.65	126
10.305	0.331	22.495
125.5	17	59.561
37.875	0.56	59.236
12.456	45.244	131.982
10.966	244.39	99.259
83.9	46.91	69.092
29.2	12.85	35.003
4.68	49.9	97.81
15.94	12.67	43.36
10.19	3.27	55.93
2.69	34.81	9.49
219.53	5.54	113.38
7.63		63.3
6.75		80.67
0
84.43
177.72
