# Supplementary material for: Myosin II isoforms play distinct roles in adherens junction biogenesis
Source: eLife. 2019 Sep 5;8:e46599. doi: 10.7554/eLife.46599 (PMC6756789; doi:10.7554/eLife.46599)
Supplement: Figure 3—figure supplement 1—source data 1. [file elife-46599-fig3-figsupp1-data1.xlsx]

## Sheet: Figure_3_supplementary_1_d
Figure_3_supplementary_1_d
Distance(um)	GFP-NMIIA	b-catenin
0	14.6673	8.28558
0.13179	16.9461	12.9131
0.26358	10.8723	16.2107
0.39536	17.8308	16.6416
0.52715	35.3512	10.4371
0.65894	55.8901	15.3803
0.79073	73.1643	20.22
0.92252	77.1275	25.3212
1.05431	66.2853	32.9407
1.18609	58.7378	49.7475
1.31788	27.6023	73.0604
1.44967	29.1076	91.1634
1.58146	38.7147	100
1.71325	35.9263	70.7556
1.84504	41.1356	48.1378
1.97682	41.2637	29.1224
2.10861	56.8512	20.9809
2.2404	74.1609	26.6123
2.37219	100	21.3146
2.50398	97.6602	19.5733
2.63576	70.9997	20.6094
2.76755	51.1464	17.7371
2.89934	38.3673	14.9803
3.03113	25.5002	11.8926
3.16292	18.2723	12.8445
3.29471	18.7842	13.5023

## Sheet: Figure_3_supplementary_1_e
Figure_3_supplementary_1_e
Distance(um)	mCherry-NMIIB	b-catenin
0	6.19496	14.733
0.13179	15.4599	15.8083
0.26358	19.188	7.23233
0.39536	19.335	4.00798
0.52715	20.7903	3.99889
0.65894	28.3826	15.3541
0.79073	36.8813	39.2965
0.92252	36.8752	39.4574
1.05431	18.7208	25.041
1.18609	8.34395	8.96456
1.31788	2.32102	35.5365
1.44967	9.63782	55.7979
1.58146	25.6373	28.1232
1.71325	56.6593	44.1508
1.84504	97.7418	78.8549
1.97682	100	100
2.10861	49.5999	63.9354
2.2404	28.3051	22.7478
2.37219	18.5197	11.3684
2.50398	11.5913	11.442
2.63576	23.9095	6.88287
2.76755	24.3405	2.57562
2.89934	20.9047	1.46798
3.03113	8.01819	12.4959
3.16292	0.0957208	26.449
3.29471	0	19.5507
