# Supplementary material for: Myosin II isoforms play distinct roles in adherens junction biogenesis
Source: eLife. 2019 Sep 5;8:e46599. doi: 10.7554/eLife.46599 (PMC6756789; doi:10.7554/eLife.46599)
Supplement: Figure 3—figure supplement 2—source data 1. [file elife-46599-fig3-figsupp2-data1.xlsx]

## Sheet: Figure_3_supplementary_2_d
Figure_3_supplementary_2_d
	WT		a-catenin KD
Distance(um)	NMIIA	NMIIB	NMIIA	NMIIB
0	3.36919	2.46283	10.9272	15.5009
0.1807	14.3048	3.23149	16.3577	20.4971
0.3615	19.1001	8.34691	14.8524	7.1012
0.5422	16.2344	3.94853	11.3599	6.64315
0.723	14.0274	1.17312	10.3084	4.70744
0.9037	5.71394	6.31069	8.76278	7.49536
1.0844	3.55739	0.59151	8.84843	4.95245
1.2652	1.76236	3.8197	3.48548	11.4575
1.4459	1.28684	5.06805	6.23178	5.76684
1.6266	5.20485	4.97977	8.76565	5.29121
1.8074	6.3347	9.76655	11.5101	5.48465
1.9881	11.5978	2.10684	11.953	10.9541
2.1689	37.1457	25.5581	6.10169	10.7404
2.3496	47.137	10.467	4.31279	20.1921
2.5303	86.3959	15.832	14.6917	14.8944
2.7111	97.9471	30.1408	21.82	17.0012
2.8918	75.1856	25.2749	29.5261	11.6107
3.0725	51.6823	9.92794	19.2877	6.95058
3.2533	28.7709	17.4021	19.2813	9.14116
3.434	3.13149	4.39281	18.0991	7.87974
3.6148	2.99122	4.19058	54.4919	36.5118
3.7955	15.1071	6.33943	100	91.4768
3.9762	25.9111	12.6006	82.1684	78.4051
4.157	35.6307	28.4585	38.6267	37.807
4.3377	30.534	35.2658	17.6556	14.7269
4.5185	14.0697	14.5696	3.33245	5.61778
4.6992	5.4425	18.1338	1.63637	2.87158
4.8799	9.17372	3.61703	0.514434	0.791243
5.0607	7.85195	4.60706	0.252743	4.52302
5.2414	4.31096	4.0891	0.197629	1.9377
5.4221	1.2526	10.8652	0.797407	2.76805
5.6029	1.15731	8.06109	1.25987	12.4699
5.7836	2.58923	3.54715	3.87485	7.91033
5.9644	1.80328	3.75716	1.13369	3.95213
6.1451	1.43927	1.51995	0.942014	2.4142
6.3258	2.10072	10.3426	0.535548	1.56272
6.5066	4.25066	18.0482	0.422297	1.24555
6.6873	4.71849	69.9494	0.848027	2.8378
6.868	3.76638	100	0.767005	1.97935
7.0488	3.05096	78.3804	0.964576	6.39341
7.2295	1.54512	44.2931	1.34342	22.1728
7.4103	3.85358	37.0911	0.795475	22.9381
7.591	1.22615	13.3086	1.06205	10.2993
7.7717	0.169262	5.50771	2.07699	12.9865
7.9525	1.22892	0.285086	1.53456	12.7786
8.1332	0.212609	1.90717	2.87597	13.2731
8.314	1.34935	3.02083	1.31658	4.3571
8.4947	0.517789	3.5003	1.60088	4.98583
8.6754	0.522876	4.05126	2.71366	4.52891
8.8562	2.69909	2.53117	6.75976	11.9087
9.0369	3.38264	6.40014	10.8979	35.092
9.2176	0.195993	4.69358	8.89015	53.4973
9.3984	2.48558	4.73149	9.40309	30.8285
9.5791	2.96703	10.6291	3.4451	12.3661
9.7599	3.10063	5.38298	4.93982	7.75227
9.9406	5.58435	6.47501	9.62121	20.7866
10.1213	6.23636	13.5922	12.6801	20.9447
10.3021	7.36383	15.7834	14.582	26.9957
10.4828	8.09237	1.40879	14.2865	19.9429
10.6636	36.2519	6.00815	24.3206	42.3213
10.8443	68.658	7.67841	24.0746	48.3875
11.025	85.3001	16.9053	17.654	39.8838
11.2058	100	16.6138	17.887	29.1748
11.3865	97.497	20.705	30.9718	51.3129
11.5672	47.2519	7.67225	53.5605	61.9931
11.748	21.4957	0.959527	40.7106	60.7937
11.9287	21.7092	1.94919	27.808	36.0817
12.1095	20.0266	3.88906	9.69244	13.6396
12.2902	22.9465	15.1107	6.3791	8.94648
12.4709	17.3641	9.13618	2.4905	5.45044
12.6517	6.81095	2.25598	1.15396	6.98961
12.8324	2.98941	2.81875	3.81514	6.92908
13.0131	4.8188	0.473823	9.50752	8.70949
13.1939	10.935	1.58227	8.19629	8.99533
13.3746	7.52846	11.104	13.6413	23.9369
13.5554	5.91542	10.8935	15.3328	13.0385
13.7361	10.2099	0.557635	20.9821	17.8272
13.9168	15.4506	1.35607	20.3433	31.2069
14.0976	12.4215	3.08865	19.4256	34.4496
14.2783	8.09717	2.72467	16.9794	18.1433
14.4591	8.54302	1.80122	15.4884	27.1395
14.6398	13.2509	4.51189	25.2564	41.5128

## Sheet: Figure_3_supplementary_2_f
Figure_3_supplementary_2_f
Distance	NMIIB	ARP 2/3	F-Actin
0	29.9159	45.9607	53.2705
0.10238	28.4594	45.0194	50.7021
0.20476	32.3519	44.9453	54.243
0.30714	32.2695	42.7999	52.3028
0.40952	33.4529	43.1261	50.3492
0.5119	32.6933	45.8069	55.3567
0.61429	32.9101	51.4902	57.3448
0.71667	34.0404	55.0287	56.6816
0.81905	35.5304	53.9385	52.6289
0.92143	34.0993	53.1736	50.3331
1.02381	33.1036	54.0741	54.8143
1.12619	37.282	53.3571	57.8165
1.22857	38.741	49.9252	56.7678
1.33095	37.9337	48.9069	53.5787
1.43333	39.1638	49.5063	54.1809
1.53571	41.5	52.2621	58.3264
1.6381	44.0051	54.8846	55.7945
1.74048	43.7217	56.1785	58.1134
1.84286	41.9695	61.9135	62.0394
1.94524	46.2275	59.7584	61.2095
2.04762	44.6266	60.1893	58.8057
2.15	44.9966	55.1513	59.1352
2.25238	45.0448	52.9227	59.4827
2.35476	44.5331	51.4055	60.0988
2.45714	44.6627	51.7494	63.3587
2.55952	46.0384	55.1078	69.4967
2.6619	47.7011	56.1419	67.5142
2.76429	46.9079	60.1219	65.8597
2.86667	48.4688	62.4323	70.3802
2.96905	47.3215	63.0747	69.4039
3.07143	55.2661	66.602	84.8135
3.17381	61.6903	67.264	93.0311
3.27619	76.802	79.2868	94.8591
3.37857	92.3308	97.9131	100
3.48095	100	100	96.7221
3.58333	96.8867	85.9424	92.5002
3.68571	87.7263	77.9912	89.4532
3.7881	76.5421	77.8049	85.0947
3.89048	64.3153	79.6401	74.3215
3.99286	57.4426	72.8552	62.5212
4.09524	47.2937	72.0478	56.0979
4.19762	49.3269	70.6858	55.2054
4.3	48.3417	62.4867	53.0423
4.40238	48.2121	57.4327	51.6407
4.50476	51.0198	58.6621	54.1863
4.60714	50.9516	62.6481	56.072
4.70952	46.1723	62.1738	59.9211
4.8119	41.0822	59.4762	64.6425
4.91429	40.8186	60.3163	69.3668
5.01667	40.2456	53.982	72.6679
5.11905	41.9774	57.5567	73.7795
5.22143	41.307	58.1577	80.4811
5.32381	42.3863	59.2416	91.7646
5.42619	45.7502	55.2188	91.8909
5.52857	47.1121	52.8733	83.5024
5.63095	45.0236	56.0352	74.4878
5.73333	43.5855	56.9588	68.7443
5.83571	41.0955	55.2407	59.0215
5.9381	36.3737	54.5129	54.3439
6.04048	36.1019	53.2855	54.2873
6.14286	35.1007	50.0426	52.0843
6.24524	34.2966	45.2821	52.2931
6.34762	32.7761	44.6295	51.217
6.45	32.5711	44.2746	53.2045
6.55238	31.8231	46.3961	57.7996
6.65476	31.8693	49.7583	59.6413
6.75714	31.2058	54.7035	55.2409
6.85952	33.6031	57.5581	53.4003
