# Supplementary material for: Myosin II isoforms play distinct roles in adherens junction biogenesis
Source: eLife. 2019 Sep 5;8:e46599. doi: 10.7554/eLife.46599 (PMC6756789; doi:10.7554/eLife.46599)
Supplement: Figure 3—source data 1. [file elife-46599-fig3-data1.xlsx]

## Sheet: Fig3_c
Fig3_c
	Raw data		Smooth data
Distance	GFP-E-Cadherin	NMIIA	GFP-E-Cadherin	NMIIA
0	51.1757	49.3725	49.6039	51.1345
0.11475	47.8482	52.6378	48.3639	57.0194
0.22951	43.3816	65.0976	45.5139	66.4651
0.34426	45.8537	75.8025	42.9884	74.7464
0.45902	41.8858	85.2106	40.4499	79.7187
0.57377	36.6378	87.8432	40.7499	81.6976
0.68853	42.3716	74.0966	43.2637	80.1703
0.80328	43.305	71.0992	46.7241	75.4873
0.91803	53.6998	74.9206	48.8096	72.467
1.03279	53.8015	71.2966	49.0584	69.7855
1.14754	49.2815	65.3667	47.8705	68.8081
1.2623	37.6256	72.7091	45.5883	67.5365
1.37705	41.5032	60.3421	41.4483	65.4056
1.49181	45.9015	62.2631	41.4562	63.0989
1.60656	40.8854	63.0744	43.3354	58.3398
1.72132	42.6001	53.5645	46.8505	51.3969
1.83607	53.4777	43.9963	47.9218	45.0824
1.95082	48.4956	34.3188	45.6157	37.5923
2.06558	50.2805	33.07	46.898	33.0652
2.18033	45.851	29.3817	53.4805	31.3687
2.29509	46.3273	32.9958	60.5819	31.5704
2.40984	77.7909	36.9014	68.1335	34.298
2.5246	92.719	33.2169	76.079	36.685
2.63935	78.351	37.5532	84.9161	37.3685
2.7541	78.3505	42.8934	91.7303	35.0823
2.86886	94.5534	37.29	92.5072	36.7
2.98361	100.002	33.5585	92.7908	45.547
3.09837	97.7146	42.9375	94.4238	52.7725
3.21312	84.2928	71.3008	87.349	57.1803
3.32788	73.8869	79.9172	73.3167	61.8436
3.44263	65.4866	56.7372	59.8073	67.0131
3.55739	40.1291	56.3127	48.7538	72.6822
3.67214	36.019	74.4508	40.5222	77.2892
3.78689	38.3735	92.5286	33.2031	83.8053
3.90165	33.4502	100	29.496	89.2974
4.0164	26.7308	87.5687	29.8762	86.0925
4.13116	23.841	73.1661	28.7529	77.9248
4.24591	31.0459	60.5848	27.1858	67.921
4.36067	30.0667	57.129	27.1174	58.3663
4.47542	26.6327	60.054	27.4542	52.0817
4.59018	24.5468	48.438	27.038	47.4889
4.70493	26.1949	38.7146	25.6772	43.7182

## Sheet: Fig3_d
Fig3_d
	Raw data		Smooth data
Distance	GFP-E-Cadherin	NMIIB	GFP-E-Cadherin	NMIIB
0	14.7917	5.654	11.7083	4.7271
0.07415	5.87969	4.30719	9.78853	3.89822
0.1483	9.23546	3.45003	8.26592	3.77754
0.22245	5.56872	0.90522	7.99683	3.50664
0.2966	9.32515	5.12771	7.94006	3.48598
0.37074	9.7279	6.34629	8.80535	4.9251
0.44489	10.804	3.91273	8.43572	6.09005
0.51904	6.66525	6.53616	10.0352	6.87006
0.59319	8.98058	9.95604	9.94776	6.73321
0.66734	11.2173	5.35072	10.5026	6.63381
0.74149	15.6666	5.86199	11.2802	6.92291
0.81564	9.20373	6.59966	13.1625	6.34389
0.88979	14.2452	6.12864	15.2559	6.27463
0.96394	15.808	7.47905	17.1831	7.0886
1.03809	19.7566	6.34928	17.0957	6.7154
1.11223	20.669	7.7529	17.1427	6.55876
1.18638	14.5866	5.85777	14.4516	6.11281
1.26053	7.26163	4.24122	11.4611	5.7635
1.33468	10.1072	6.76268	8.68161	5.67704
1.40883	7.68589	4.78593	9.38981	5.24151
1.48298	10.7148	6.45744	11.2178	5.32592
1.55713	14.9939	5.31501	15.8357	6.10067
1.63128	22.3422	4.99886	18.9248	5.93446
1.70543	17.1299	7.01625	20.439	6.08321
1.77958	26.9646	9.02119	20.2914	7.45667
1.85372	16.4756	5.48399	18.9906	8.26762
1.92787	13.1785	9.3043	16.5795	9.39469
2.00202	16.773	14.6258	12.1827	8.95572
2.07617	15.3968	8.86477	8.9576	6.7631
2.15032	13.7452	15.7061	19.6027	16.2019
2.22447	17.0596	17.8761	38.7874	32.5941
2.29862	54.9381	39.5673	60.3275	56.922
2.37277	100.001	99.9988	72.7596	80.7755
2.44692	98.6027	102.697	80.6434	90.7322
2.52107	75.9312	104.906	83.1284	90.2369
2.59521	44.5186	69.2417	76.2989	76.0897
2.66936	71.561	34.0306	63.0828	53.3578
2.74351	72.3866	38.3443	56.2777	35.9375
2.81766	53.3827	27.2335	50.304	23.6608
2.89181	29.9235	22.0024	41.6835	20.0013
2.96596	33.5926	13.8601	30.0465	17.5701
3.04011	18.2645	15.8875	23.902	13.5313
3.11426	20.9286	12.2085	23.9399	12.4455
3.18841	34.6964	9.77152	25.85	11.6708
3.26256	25.6143	14.3962	27.7396	12.1329
3.3367	28.8766	11.2429	30.8106	11.6934
3.41085	27.4185	10.7864	27.9898	11.2516
3.485	31.1103	12.3001	23.7819	10.485
3.55915	19.4133	8.6577	20.4899	9.07919
3.6333	9.42529	6.7281	16.1321	8.32705
3.70745	15.5059	8.68209	13.0078	7.57259
3.7816	10.0773	8.21024	11.2519	8.48362
3.85575	13.4591	8.11093	11.695	9.98589
3.9299	13.6855	11.3393	12.5035	11.1506
4.00405	14.1216	15.6218	15.19	12.075
4.07819	13.1893	10.369	18.3237	12.3212
4.15234	20.9582	11.0894	19.8474	10.7981
4.22649	29.9267	11.1859	20.1291	8.82051
4.30064	16.7734	6.79273	19.2028	9.1726
4.37479	16.7718	5.84285	21.4991	9.93852
4.44894	15.6531	12.7746	20.9553	10.1585
4.52309	21.4906	18.0834	18.8658	12.5573
4.59724	32.9669	9.63928	18.8748	14.2976
4.67139	12.2638	15.2153	18.2104	16.7927
4.74553	11.4021	22.7002	19.9336	19.2872
4.81968	20.6571	17.8954	22.7057	22.7628
4.89383	30.2199	30.3484	27.2285	27.321
4.96798	40.317	30.9108	35.4353	29.5112

## Sheet: Fig3_e
Fig3_e
Ecad/NMIIA_Day1	Ecad/NMIIB_Day1	Ecad/NMIIA_Day3_Basal	Ecad/NMIIB_Day3_Basal	Ecad/NMIIA_Day3_Apical	Ecad/NMIIB_Day3_Apical
-0.64	0.14	-0.12	-0.17	-0.46	0.07
-0.36	0.03	-0.11	-0.39	-0.4	0.17
-0.46	-0.15	-0.01	-0.13	-0.42	0.14
-0.23	0.29	-0.41	-0.36	-0.34	0.02
-0.34	-0.38	-0.09	-0.1	-0.44	0.06
-0.48	0.19	-0.38	-0.09	-0.06	0.22
-0.36	-0.02	-0.01	-0.09	-0.22	0.13
-0.42	0.55	-0.41	-0.26	0.09	0.38
-0.09	0.32	-0.53	0.09	-0.34	0.33
-0.47	0.36	-0.44		-0.34
-0.04	-0.17	-0.19		-0.35
0.05	0.15	-0.17		-0.39
-0.15	-0.2	-0.3		-0.43
-0.11	0.02	-0.11		-0.04
-0.06	0.03	-0.41		-0.45
-0.03		-0.08		-0.41
-0.17		-0.13		-0.1
-0.11		-0.08		-0.26
-0.41
-0.32
-0.23
-0.43
-0.59
-0.33
