# Supplementary material for: Myosin II isoforms play distinct roles in adherens junction biogenesis
Source: eLife. 2019 Sep 5;8:e46599. doi: 10.7554/eLife.46599 (PMC6756789; doi:10.7554/eLife.46599)
Supplement: Figure 4—source data 1. [file elife-46599-fig4-data1.xlsx]

## Sheet: Fig4_c
Fig4_c
	Raw Data			Smooth Data
Distance	F-Actin	NMIIA	NMIIB	F-Actin	NMIIA	NMIIB
0	20.35	17.87	29.88	19.9917	14.6207	36.8522
0.03968	19.18	10.26	42.19	20.4463	14.0183	41.5558
0.07937	20.95	12.48	50.25	21.2259	15.6888	43.2624
0.11905	23.1	15.69	46.11	22.2674	17.8681	41.0949
0.15873	24.23	22.58	33.49	23.6728	18.6016	34.9568
0.19841	25.24	24.09	20.96	25.6209	17.9471	25.053
0.2381	26.93	14.44	14.05	27.7268	14.6901	15.4194
0.27778	29.8	5.15	9.52	30.1779	10.4667	8.89931
0.31746	33.2	3.51	6.04	32.8323	5.59762	5.73909
0.35714	35.8	4.56	4.2	35.1864	2.00862	4.55121
0.39683	37.17	3.64	4.94	36.8332	0.85511	4.49225
0.43651	37.58	0.49	6.75	37.4815	1.40329	6.28437
0.47619	37.5	0.64	9.37	37.2166	2.78836	10.563
0.51587	37.33	5.54	14.84	36.8152	5.33338	16.8561
0.55556	37.08	14.2	23.43	37.3017	11.3946	23.8207
0.59524	38.16	22.36	32.12	39.5827	23.9232	29.9239
0.63492	42.6	34.2	36.51	43.8699	42.1743	33.7093
0.6746	49.73	58.16	36.24	50.0124	62.5225	34.8446
0.71429	57.77	86.46	33.48	57.547	79.3363	34.9874
0.75397	64.31	100	31.89	64.9679	89.015	36.104
0.79365	69.53	95.88	35.03	69.6982	91.4369	38.0252
0.83333	71.72	81.01	41.51	69.1974	89.1079	38.5858
0.87302	66.95	73.2	42.91	62.7388	84.6898	36.3971
0.9127	53.8	78.36	33.84	51.9772	79.0927	31.8571
0.95238	36.5	82.35	20.96	39.5301	71.2276	25.9002
0.99206	23.74	67.81	14.72	28.0624	59.4074	19.5219
1.03175	18.58	40.29	15.52	19.6623	42.8142	14.2869
1.07143	17.13	17.28	15.12	15.2869	24.04	11.1221
1.11111	15.65	4.14	10.09	14.5662	8.68901	9.18173
1.15079	14.72	0.56	5.17	15.9646	0.898575	7.24602
1.19048	16.59	1.08	3.94	18.1522	-0.32463	5.81788
1.23016	21.01	2.59	5.69	20.4243	1.10264	6.06009
1.26984	24.29	3.34	8.31	22.1564	2.39736	7.63117
1.30952	24.32	3.29	10.71	22.7615	2.04329	9.10035
1.34921	22.04	2.02	10.87	22.2941	0.679741	9.86191
1.38889	19.98	0.49	9.17	21.6344	0.601517	10.0391
1.42857	20.31	0.45	8.55	21.849	3.4671	9.65836
1.46825	23.09	6.73	10.06	23.1126	9.88303	9.13065
1.50794	26.24	20.09	11.05	24.8678	20.4733	10.0157
1.54762	27.78	32.75	11.06	26.6022	33.2187	13.1072
1.5873	27.58	43.44	14.14	28.145	43.2089	17.5387
1.62698	27.79	51.76	21.76	29.3381	45.9248	21.2464
1.66667	29.73	47.08	27.07	29.9551	40.9187	22.8225
1.70635	31.69	29.79	25.34	29.9001	30.7241	21.7149
1.74603	30.94	12.7	17.04	29.4785	18.0893	18.0755
1.78571	28.2	4.29	9.66	29.0597	6.41308	12.9113
1.8254	26.73	0.73	6.79	28.9746	-0.416014	8.23468
1.86508	28.55	0.24	7	29.3745	-0.956144	5.77996
1.90476	31.5	4.35	6.96	30.2736	5.87126	6.41152
1.94444	32.77	14.34	7.38	31.1545	20.2133	9.13347
1.98413	31.51	32.28	10.65	31.3739	38.6927	12.3164
2.02381	30	59.05	16.21	30.7279	53.7933	14.5674
2.06349	29.19	75.96	18.6	29.7675	60.907	15.2211
2.10317	29.21	69.08	15.92	29.1552	61.5528	14.1618
2.14286	29.31	48.42	11.06	29.0977	59.5325	12.3484
2.18254	29.46	42.37	8.8	29.3509	57.5939	12.0969
2.22222	29.76	56.24	11.59	29.9348	57.8126	14.9191
2.2619	30.29	69.86	19.11	30.865	59.4166	19.901
2.30159	31.3	66.94	27.77	31.9023	57.3552	24.2119
2.34127	32.63	48.88	29.66	32.2509	47.546	25.4812
2.38095	32.57	27.58	24.12	31.2061	31.7447	22.8836
2.42063	29.95	10.49	14.95	28.5361	16.3901	16.9916
2.46032	24.86	4.98	8.19	24.735	6.68619	9.85165
2.5	19.98	5.04	4.11	20.7688	4.37719	4.42152
2.53968	17.21	8.22	1.43	18.1221	8.47433	2.17403
2.57937	17.68	13.29	1.25	18.272	15.4451	2.2768
2.61905	20.84	21.37	3.94	22.0805	20.6477	3.01411
2.65873	27.29	27.87	6.78	28.7538	22.2995	4.11303
2.69841	36.31	23.94	6.78	36.2724	20.3974	6.09468
2.7381	45.14	13.44	7.53	42.3994	15.6097	9.38412
2.77778	49.25	5.82	13.38	46.2239	9.35602	14.6361
2.81746	48.33	3.48	23.44	48.1468	4.35052	23.5984
2.85714	46.23	2.57	36	49.3007	2.72299	37.4636
2.89683	47.91	3.47	51.27	50.6249	3.61827	53.8869
2.93651	52.84	5.7	70.44	52.46	4.99346	69.3223
2.97619	56.64	6.79	87.15	54.0929	5.69723	81.7859
3.01587	56.19	6.08	93.16	54.3978	5.59931	91.7181
3.05556	52.58	4.78	93.87	52.7968	4.81918	98.255
3.09524	48.47	3.22	95.99	50.0498	3.77918	98.9816
3.13492	45.9	2.4	99.99	47.3682	2.99814	93.8249
3.1746	44.8	3.15	92.24	45.0995	2.88056	85.7184
3.21429	43.7	3.83	74.04	42.4149	3.79269	76.817
3.25397	40.47	4.46	60.72	38.4299	5.42381	68.333
3.29365	34.35	6.37	60.14	33.31	6.74169	62.8026
3.33333	27.11	8.8	64.3	28.2711	7.09108	63.3147
3.37302	22.32	8.13	66.73	24.776	6.76121	67.3037
3.4127	22.23	5.09	69.84	23.7026	5.88792	68.1123
3.45238	25.27	3.14	69.11	24.7583	4.46338	62.0457
3.49206	28.53	3.24	56.09	26.9003	3.18022	51.713
3.53175	30.07	3.15	35.94	28.8949	2.84849	41.0465
3.57143	29.91	2.76	23.2	30.1905	3.12256	31.9411
3.61111	30.14	3.43	24.35	31.0833	3.2629	25.7005
3.65079	31.25	3.78	28.08	32.0611	3.16108	22.9523
3.69048	33.15	2.93	25.47	33.077	3.0226	21.774
3.73016	34.5	2.32	18.39	33.6219	2.74701	18.9739
3.76984	34.19	2.42	12.16	33.0848	2.26294	13.6643
3.80952	31.8	2.11	7.74	31.5781	1.82736	8.14243
3.84921	28.9	1.63	4.03	29.5618	1.66186	4.36082
3.88889	26.79	1.61	1.96	27.6346	1.84372	2.38403
3.92857	26.4	1.93	1.51	26.3075	2.46901	1.35437
3.96825	26.49	3	1.51	26.0438	3.3471	0.932988
4.00794	26.71	4.56	1.48	26.953	3.96455	1.16991
4.04762	27.84	5.22	1.41	28.8125	4.0671	1.85662
4.0873	30.64	4.08	2.44	31.0346	3.91173	2.63381
4.12698	33.86	2.68	4.5	33.1403	3.80818	3.80165
4.16667	35.73	2.73	6.41	34.6173	3.73004	6.1842
4.20635	35.46	4.19	8.1	35.0225	3.52481	10.0952
4.24603	34.22	5.15	12.63	34.3139	3.64121	14.3728
4.28571	32.94	4.1	19.14	33.1441	4.47126	17.4722
4.3254	32.11	3.1	22.59	32.5907	5.37104	18.9502
4.36508	32.3	5.42	19.85	33.3214	5.47264	19.0795
4.40476	34.03	7.88	15.08	35.019	5.28909	17.9644
4.44444	37.01	5.79	13.88	36.6912	5.06965	15.9553
4.48413	38.81	2.23	14.98	37.1701	4.16004	13.7982
4.52381	37.42	2.36	14.39	35.8411	2.28476	12.0792
4.56349	33.02	1.84	10.99	32.6244	0.526278	10.6728
4.60317	27.64	0.14	7.62	28.3455	-0.43212	9.4113
4.64286	23.93	0.12	7.14	24.5233	-1.2129	8.65078
4.68254	21.99	2.89	9.23	22.8349	1.84446	8.95429
4.72222	23.02	8.08	11.48	24.137	14.4369	10.3213
4.7619	26.84	21.02	12.13	27.9883	34.8917	12.1111
4.80159	33.2	53.25	12.66	33.0294	53.7453	13.2384
4.84127	39.23	82.58	13.37	37.7489	63.4031	13.0351
4.88095	42.39	77.8	13.42	40.8322	61.4473	11.7144
4.92063	42.37	43.49	10.99	41.6893	48.5561	10.2889
4.96032	40.3	15.1	8.1	40.5438	28.4537	9.64273
5	38.11	3.93	8	38.5035	10.1219	10.3739
5.03968	36.55	2.33	11.98	37.0513	0.781735	12.4824
5.07937	36.38	3.65	17.02	37.1916	-0.707314	15.6613
5.11905	38	4.42	20.29	38.9626	0.804331	19.0664
5.15873	41.76	4.3	21.12	41.5625	5.69342	21.4447
5.19841	45.78	7.75	21.4	44.1868	14.9858	21.8876
5.2381	48.15	22.42	21.28	46.9175	27.0949	20.4612
5.27778	49.21	45.2	18.76	50.295	39.5385	17.759
5.31746	51.62	56.92	14.27	54.4091	50.1677	14.2136
5.35714	57.84	55.84	9.79	58.5347	55.5648	10.1336
5.39683	64.38	51.32	6.74	61.6669	53.2626	6.59507
5.43651	66.76	46.84	4.98	63.2848	44.805	5.52896
5.47619	64.05	36.93	5.66	63.6324	35.5005	8.03667
5.51587	61.3	26.75	10.71	63.8806	28.7301	13.3316
5.55556	63.28	22.17	19.75	66.0473	26.391	19.1381
5.59524	70.33	26.58	27.05	71.7158	29.3267	23.1215
5.63492	80.2	36.99	27.33	80.536	37.5666	23.8572
5.6746	90.1	50.48	21.19	89.7167	48.7145	21.3058
5.71429	97.83	59.96	14.04	95.9011	58.9045	16.7009
5.75397	100	65.39	10.12	97.1935	64.3063	12.0713
5.79365	94.65	65.87	9.38	93.4237	62.9386	9.05736
5.83333	84.36	58.01	9.29	85.4766	54.3623	8.13927
5.87302	73.34	43.71	8.9	74.6166	42.4477	8.96667
5.9127	62.8	28.61	9.58	62.4873	31.886	10.9513
5.95238	51.95	18.32	12.42	50.9017	26.5536	13.3965
5.99206	40.84	23.05	16.61	41.1833	26.7485	15.7714
6.03175	32	33.97	19.16	34.1168	30.2666	17.3881
6.07143	28.2	40.85	18.28	30.0664	34.3937	17.6123
6.11111	28.56	36.52	15.99	28.7027	35.427	16.0379
6.15079	30.17	29.46	13.43	28.8316	30.6789	13.218
6.19048	30.31	23.67	11.48	28.7273	21.9193	11.2069
6.23016	28.14	14.6	10.15	27.2204	13.1564	12.037
6.26984	24.36	7.53	12.37	24.4187	10.4683	15.8855
6.30952	20.36	7.67	20.18	21.2207	15.9738	21.1496
6.34921	17.75	18.87	28.76	18.5535	26.402	25.6472
6.38889	16.73	41.56	31.41	16.8989	35.257	27.517
6.42857	16.51	53.1	26.64	16.2648	38.0259	25.539
6.46825	16.43	39.74	18.98	16.3065	33.7328	19.9693
6.50794	16.46	14.34	11.73	16.5337	23.2749	13.1064
6.54762	16.61	2.03	6.66	16.638	10.054	7.71351
6.5873	16.56	0.57	4.21	16.4474	0.668401	5.13632
6.62698	16	0.25	4.83	15.736	-1.75251	5.23018
6.66667	14.82	0.35	7.41	14.3753	-0.201385	7.28134
6.70635	12.94	1.79	10.36	12.7006	0.974416	10.0758
6.74603	10.62	1.98	13.34	11.073	1.16251	12.6713
6.78571	9.05	0.58	15.26	9.79165	1.12762	14.4563

## Sheet: Fig4_d
Fig4_d
F-Actin/NMIIA_Jctnal	F-Actin/NMIIA_Perijctnal	F-Actin/NMIIB_Jctnal	F-Actin/NMIIB_Perijctnal
-0.24	-0.42	-0.01	-0.36
-0.09	-0.02	0.19	0.21
-0.31	-0.23	0.12	-0.25
-0.16	0.09	0.09	-0.32
0.06	0.12	-0.26	-0.3
-0.4	0.15	-0.13	-0.28
-0.19	0.03	0.06	-0.26
-0.38	0.02	0.15	-0.09
0.06	0.13	0.08	-0.4
-0.14	-0.27	0.2	-0.03
-0.16	-0.01	-0.08	-0.33
-0.37	0.15	0.01	-0.29
-0.39	0.04	-0.24	-0.45
-0.4	0	-0.01	-0.39
-0.27	-0.1	0.11	-0.27
-0.16	0	-0.23	-0.21
-0.23	-0.12	0.08	-0.28
0.01	0.45	-0.13	-0.1
		0.04	-0.2
		0.17	-0.13
		-0.25	-0.39
		0.06	-0.21
		0.07	-0.25
		0.03	-0.07
		0.17	-0.39
		-0.09	0.27
		0.16	-0.5
		-0.16	-0.18
		0.11	-0.11
		0.05	-0.41
		0.13	-0.38
		0.28	-0.21
		0.05	-0.06
