# Supplementary material for: Myosin II isoforms play distinct roles in adherens junction biogenesis
Source: eLife. 2019 Sep 5;8:e46599. doi: 10.7554/eLife.46599 (PMC6756789; doi:10.7554/eLife.46599)
Supplement: Figure 5—source data 1. [file elife-46599-fig5-data1.xlsx]

## Sheet: Fig5_c
Fig5_c
Distance	NMIIB	Cortactin		Distance	NMIIA	Cortactin
0	34.3139	37.9894		0	52.6475	16.9217
0.13179	32.8432	40.5027		0.13179	58.314	21.7233
0.26358	36.0518	44.0679		0.26358	58.9885	27.1737
0.39536	39.4384	48.7436		0.39536	59.9999	34.0252
0.52715	40.5971	50.2633		0.52715	65.0927	41.3962
0.65894	37.4776	47.3991		0.65894	74.6713	47.2876
0.79073	34.0909	44.7691		0.79073	84.2158	48.4817
0.92252	32.1301	47.6332		0.92252	91.8718	44.2772
1.05431	29.3226	50.9061		1.05431	97.639	38.3596
1.18609	21.4797	49.2112		1.18609	100	34.4667
1.31788	18.7613	42.8402		1.31788	98.8872	33.8178
1.44967	22.2818	42.6067		1.44967	90.6576	36.4909
1.58146	31.417	45.7043		1.58146	72.6479	42.8238
1.71325	38.1462	47.9252		1.71325	50.7929	52.5563
1.84504	40.2851	48.1003		1.84504	30.5563	63.8721
1.97682	48.9305	47.8668		1.97682	17.875	74.046
2.10861	65.9985	55.8153		2.10861	11.0963	82.4812
2.2404	87.4778	78.8429		2.2404	11.4672	89.2552
2.37219	99.5099	98.13		2.37219	17.8076	93.0962
2.50398	100	100		2.50398	24.9578	97.2745
2.63576	90.9539	91.4087		2.63576	31.2988	99.6365
2.76755	73.7969	80.8302		2.76755	32.1754	100
2.89934	58.5562	68.7319		2.89934	28.0946	98.3388
3.03113	43.3601	53.6529		3.03113	24.0812	95.2241
3.16292	31.1054	39.1582		3.16292	27.6223	87.5159
3.29471	23.1285	31.5605		3.29471	38.8193	74.1498
3.42649	20.5436	30.801		3.42649	49.9156	58.474
3.55828	23.5296	36.2362		3.55828	55.6495	44.5626
3.69007	29.3671	43.5419		3.69007	60.8431	33.3763
3.82186	33.7789	47.4575		3.82186	67.3863	26.836
3.95365	37.567	47.3408		3.95365	75.1096	24.5782
4.08543	35.6507	45.1783		4.08543	80.6073	26.6024
4.21722	29.5902	42.6651		4.21722	81.9563	31.8973
4.34901	25.4455	41.6714		4.34901	82.5293	35.401
4.4808	23.4851	43.7755		4.4808	82.6981	34.1551
4.61259	22.8165	44.0095		4.61259	80.0336
4.74438	24.3317	44.7107		4.74438	70.6238
4.87616	29.0106	50.0876		4.87616	56.5935
5.00795	34.0909	58.0361		5.00795	46.7454

## Sheet: Fig5_d
fig5_d
IIA/Cortactin	IIB/Cortactin
-0.1	0.06
0.09	-0.37
-0.42	0
-0.12	0.16
-0.35	0.05
-0.38	-0.06
-0.09	0.67
-0.37	0.62
0	-0.17
-0.11	0.45
-0.33	0.21
-0.53	0.14
-0.26	0.47
-0.4	0.32
-0.26	0.15
-0.13	0.44
-0.37	0.41
-0.45	0.41
0.06	0.35
-0.43	0.26
-0.26	0.36
-0.13	0.39
-0.12	0.24
-0.43	0.03
-0.1	-0.08
-0.49	0.1
-0.19	0.17
0	0.15
-0.53	0.62
0.14	0.49
-0.37	0.42
	0.28
	0.12
	0.1
	0.16
	0.19

## Sheet: Fig5_f
Fig5_f
Distance	Ctrl															NMIIA KD															NMIIB KD
0.13179	18586.6	20687.2	11613.4	15823.1	16492.3	18710.7	16557.5	19489.2	20727.5	17391	0.13179	22379.6	32641.8	21339.6	21457.1	8127.86	3516.84	8143.94	11414.6	10210.9	6567.06	11657.1	8261.48	16874.3	16274.5	25356.6	15943.1	16716.8	11718.4	15017.1	8789.07	24048	19914.9	15004.7	42402.7	27609.8	15392.6	24724.4	26162.7	11120.2	22606.8	18583.5	24948.8	23096.5	18574.4
0.26358	20308.6	20693.4	12254	15975	18887	16962.3	15009.3	19984.6	18783.5	14432.6	0.26358	19964.3	30739.2	22121	23325.4	7269.21	3841.14	6571.24	10499.9	11359.6	8562.16	9298.29	6124.03	16103.5	18771.9	22251.3	20112	8817.19	14921.4	15997	9464.59	23841.7	19215.2	15029.4	38853.1	29458.8	12748.6	27762.1	27073	9925.92	23651.1	16319.9	24373	21389	13918.5
0.39536	18671	21628.3	13186.2	18094.7	19105.3	16549.5	15385.5	21111.7	18891.3	11987.8	0.39536	18018.7	26331.1	23419	23335.8	7744.62	4148.58	5240.88	12950.6	14185.8	9667.29	9182.65	7067.51	16305.1	18754.3	25492.7	19197.9	5844.71	13989.6	17726	9968.96	27602.1	17535.3	16443.2	36884.3	28478.8	10911.3	31470.5	26887.9	10273.6	22400.8	19350.1	23534.3	25792.7	13672.4
0.52715	16853.7	21295.9	17586	19828.2	17948.5	16011.3	15901	19454.9	21981	11357.9	0.52715	17087.8	28921.9	24646.4	19778.4	8347.49	4175.62	6646.85	13980.5	15959.9	6891.34	9599.51	7936.28	17655.9	16194.2	24825.3	19367.6	9929.43	12092.9	21492.2	12928.2	27563.8	18654.7	17881.2	36145.2	26662.6	12846.2	33229.2	27291.8	13178.8	20004.1	21309	23458.7	26390.7	13830.4
0.65894	18825.8	19878	18084.3	18367	17787.7	13596.7	17502.5	15747.9	19668.8	10134.8	0.65894	15668.4	26934	26099.5	21600.5	9550.05	4807.1	8427.22	12151.6	16947.6	5649.84	12094	8564.93	18471.3	14309.2	22187.7	17831.8	15847.6	12086.9	24343.6	14670.8	25266.3	20315.2	18345.6	34759.1	22728.5	15241.2	32474.5	28837.2	18445.6	20781.8	21620.3	20825.5	22495.7	14473.2
0.79073	20971.9	17514.2	15000.5	16771.8	14958.6	14173.6	20476.8	15448.7	16385.2	8243.12	0.79073	16153	25027.2	20532.3	24220.6	10047.7	5896.68	8938.3	13457.5	15800.6	6380.44	20896.6	8764.91	16342.1	14717	24425.7	17644.8	17266.6	11744.5	25442.8	14169.6	24383.2	18421.5	19161.7	36296.6	20166.6	16738.8	31713.1	30705.7	27142	24120.5	18186.5	20746.3	21622.5	16076.3
0.92252	19677.4	17521.2	15212.8	16363.5	16491.6	16036.3	20922.2	15013.2	15816.4	10074.3	0.92252	15778	23639.1	20986.1	24430.1	8158.88	7089.19	10770.2	14769.2	14047.9	7553.63	24936.8	8690.58	12946.2	15746.4	25209.8	18842.1	13852.3	11729	24501.5	13414.1	26132.1	17954.3	21514.4	39945.3	17328.7	18520.5	40918.2	30360	36015.1	20285.5	17804.3	23082.8	22918.6	17918.3
1.05431	18930.4	24343.7	15229.3	19185.3	20503.5	19793.6	21203.6	13959.6	20523.1	13374	1.05431	14123.1	26207.6	23634.9	20921.8	6558.02	7425.36	10074.9	15885.6	12065.1	8266.12	20578.8	6710.41	10568.1	14071.6	26288.1	18150.6	13774.1	11860.1	23582.3	12224.7	23338.3	19200.7	20059.4	42511.4	16885.5	19254.7	46416.9	31389.1	38750.5	23652.8	21050.3	25922.6	23083.3	20307.7
1.18609	19822.3	27856.7	14137.5	22718.8	23236.2	20526.1	20807	13541	21311.1	18734.2	1.18609	15865.4	31148.8	24716.4	24454.5	7452.19	7631.95	11502.8	19294	11935.4	8611.34	18947.2	6176.15	15053.8	12509.2	22335.7	16841.7	16602.3	12699.9	23284.2	12631.9	22227.8	21646.6	16742.8	44066.4	18720.8	22063.8	47310.3	30719.1	36778.1	28501.2	23856.6	28391.9	31677.2	25372.2
1.31788	15082.6	30353.2	13906.4	21923.2	18981.7	16589.9	19606	12944.8	26725.1	24721.8	1.31788	15965.7	34624.8	26365	26030.2	10099.7	8410.95	14436	19913.4	10616.2	7337.71	17026.4	7042.68	17261.8	12872.4	17286.8	19692.5	21111.8	15777.1	18083.1	14216.1	21251.3	19677.3	18812.2	45613	23799.8	26499.9	47561.4	31442.7	39226.9	30432.1	26584.2	25433.2	35313.9	26232
1.44967	16550.9	28439.2	17782.1	19020.8	17486.3	16293.3	18549.3	12024.3	27492.3	24423.1	1.44967	15163.4	32743.8	28039.7	24482.4	11310.7	7224.76	15290.6	18640.7	9408.58	5812.27	12402.8	9749.63	17992.4	14247.5	18109.8	20740.9	19840.8	18037.5	12797.9	14077.5	26873.9	20923.6	21619.8	46864.6	28818.8	28983	46887.5	35478.9	41325.4	32801.1	31394.8	27111.4	34509.8	24603.2
1.58146	21908.9	27375.3	22385.1	17592.3	19356.4	17259.8	20102.5	11608	18463.2	18920.6	1.58146	14936.6	33591.6	29673.6	21904.6	12830.8	4349.59	15403.5	17474.6	11667.3	5654.88	9216.92	13551.4	16532.9	15760	23357.5	21486.5	16731.3	23150.7	14469.2	14458.1	25590.3	21023.7	22933.9	47612.1	30093.6	25669.1	43776.3	45208.9	49383.3	36323.8	28617.9	30365.1	30011.6	25376.8
1.71325	23164.9	29446.7	22381.1	19185.7	25862	21154.5	19566	11920.9	12764.4	16774	1.71325	20370.5	34155	31480.5	21441.8	12676.8	3346.54	15757.9	15763.2	15480.3	7282.33	11076.9	16793	15702.7	15984.8	32004	22223.6	15383.1	25538.4	11670.1	15940.7	24268.4	23707.2	16717.6	49106.8	36176.8	23874.1	43932.9	46321.8	54729.4	40339.7	30072.3	31651.8	29189.4	31096
1.84504	23260	32326.5	20352.1	18342.5	37223	24775	19116.8	11779.9	15511.1	13063	1.84504	24108.7	37777	34658.5	22045.2	9107.67	4774.75	14632.7	17740.6	16521.8	11071.1	14500	17200.3	13893.9	18927.2	38724.2	21258.2	17896.8	22718.3	8553.95	18694.4	28861	29189	14759.3	47603.6	47189.6	24617.8	43526.7	48214.4	50625.8	45651.5	31462.8	30783.5	31213.9	36297.4
1.97682	23891.1	34742.9	20470.8	17810.5	43678.3	28906.2	20140.6	12843.5	26760	13123.3	1.97682	27206.5	44089.8	33481.9	22545.7	9429.11	7288.58	17192	13698.5	22820.8	16355.5	17189.5	20257.2	15788.2	20547.6	40703.2	18821.1	22181.5	19777.4	7450.16	22923.1	32337.4	39485.2	15411.8	47017.4	58714.6	24171.3	38523.4	52856.5	44791.7	46558.7	30924.8	32269.9	31417.1	34425.9
2.10861	28328.3	40912.1	32533.1	13906.8	38474.1	37046.2	21556.7	17267	35015.6	15520.6	2.10861	40865.4	55020.3	37333.2	27968.6	8455.03	9812.32	19945.4	13225.7	30198.2	18534.4	19237.3	27873.8	18621.7	20347.4	27957.8	17533.8	28061.9	20672.9	9671.59	26847.8	41935.6	44383.3	17226.6	50062.6	65247.9	27621.3	39145.2	50125.2	34095	43912.2	29241.1	40969	31442.4	28732.4
2.2404	35035.6	54745.5	42228	15342.5	36771	39916.7	31311.8	22528.2	39136.2	22041.9	2.2404	61695.3	53965.8	34578.6	36328.4	7495.24	11175.3	21479.7	15927.3	28307.3	18316.2	25164	32104.8	24303	28131	21399.5	20922.6	33715.4	25133.7	14731.3	27993.5	46595.1	50520.8	18235.5	54454.5	62045.8	30290.5	42785.2	43921.7	29807.1	41878.9	24714.3	39594.6	31051.9	27572.4
2.37219	43391.2	50548.8	42644.2	18438.1	33947.9	30202.1	36592	26408.8	45784.6	30797.8	2.37219	65535	45983.9	27099.4	39885.8	9968.62	8970.25	24135.4	20719.6	23737.1	22228	38267.4	32310.1	29275.3	31226	20332.3	25594.5	28150.6	33324.8	25247	25407.9	42335.5	48658.5	19270	62486.6	59852.6	28657.2	42266.1	40031.9	33933.5	41822.5	23843.2	39083.2	31255.1	31440.8
2.50398	53337.9	38108.1	42328.7	22937.8	33451.1	26274	35415.3	26600	55920.7	48399.2	2.50398	52877.7	43160.6	22904.8	41146.6	14049	7512.65	26859.1	32079.9	21360.6	27926.2	44524	25347.8	26346.5	32780.1	16604.1	25954	23044.2	28100.3	34070	22022	37541.2	42826.6	20227.4	65336.1	62702.9	25207.5	34373	38214.9	39241	44876.2	22301.7	38950.8	33540.2	37275.1
2.63576	42676	31355.4	39915.3	27665	27649.1	26229.3	31433.6	23316.2	64828.6	59798	2.63576	28369.2	45108.3	25116.5	38218.5	15878.1	9535.01	33855.7	38083	18256.8	30981.4	36014.1	20797.2	24486.5	31280	14620	22678.7	19587.7	23937.5	26295.1	20817.7	33711	36561.5	19944	65535	60256	28067.5	31936.7	41694.7	45343.6	36760.8	25368.8	37441.1	36345.8	43644.4
2.76755	23828.4	25550.3	31806.2	29805.6	21328.8	23503.6	25020.3	19646.3	60657.6	52292.3	2.76755	17092.8	42170.2	23283.6	28646.5	17225.2	11938.8	34736.2	34502.2	15358.4	28982.1	27781.6	16731.9	23682	27204.7	15271.4	17585	15293	17808.3	17639.2	23429.5	32042.5	34628	21204.9	65535	55894.3	30872	30748.4	48550.5	43770.7	29107.1	32280.7	31583.5	37882.8	43240.8
2.89934	17177.4	23264.4	25019	36001.6	19439.9	22074.8	22064.6	15849.4	34818.9	22181.7	2.89934	16636.1	33629.4	19126.8	22732.2	16594.4	9908.34	30266.2	27692.7	15071.1	23575	24254.5	14301.4	20232.3	23374.7	18099.1	15348.1	13624.6	17029.6	12344.5	25409.7	34223.5	33676.9	24341.8	65490.8	47716.6	32384.2	36659.3	55304.8	39835.6	27696.5	34281.2	32226	33443.8	36249.1
3.03113	18956	22965.5	22842.1	45040.4	18510.6	19168.6	21553.5	14373.4	18267.8	17756.2	3.03113	13566.8	31775.5	18329	22865.2	13322.2	6462.37	25355.5	18458.5	17729.8	19240.4	23355.7	13976.8	18212.7	22209.3	22008.2	13979.7	17358.4	17726.9	10734.6	21716.6	38211.6	37731.5	28099.2	64946	40260.8	32446.6	40794.3	61604.2	37596.4	31088.7	27502.1	28277.6	27771.2	31975.4
3.16292	22090.3	22870.6	20953.8	39914.6	17739.6	18922.6	22746.5	14895.9	20731.4	16571.5	3.16292	15837.3	22529.2	18351.3	24984.4	9937.05	4797.1	21915.7	13192.9	17359.1	15708.4	24520.4	14391.1	16447.1	21717.1	23005.1	13536.2	21051	15479.7	15613.8	19810	36799.2	34791.8	33922.7	63607.2	37986.6	31367.9	32545.9	61004.1	41416.5	31789.3	23484.5	26537	24692.5	34117
3.29471	25691.4	25392	19087	28603.6	17563.9	18592.6	21901.4	18082.8	25268.9	12429.2	3.29471	20834.2	19898.1	17156.4	26681.5	7917.34	6043.52	18728.4	9480.22	14937	14247.3	28146.2	12500.9	14984.9	20413	21721.4	15871.6	24176.1	13668	26769.3	19077.1	37104.2	28744.1	30598.2	65535	42581	33710.2	25998.4	55574.6	45964	35073.4	23063.1	26081.7	25354.9	34168.1
3.42649	26119.8	25140.8	19900.3	19236.5	16790.9	18149	19516.7	22294	28375.8	14511.9	3.42649	24202	20717.9	14932.2	23411.9	8274.02	6585.41	15699.7	8872.59	15436.8	14875.4	29056.2	12927.9	14757.3	17939.2	19990.9	16440.8	20338.6	15025.1	27568.9	20204.6	36685.4	25813.5	22870.4	65535	50489.9	33500.7	25238.9	50377.9	39084.7	36453.4	23152.4	28820	29216.5	26769.8
3.55828	26101.1	24915.2	19602.3	14064.3	16400.7	16809.8	18561.8	20906.1	25375.3	14645.7	3.55828	19643.7	24116.2	19780.3	18347.9	10012.5	7265.43	12974.9	8802.95	15357	14631.3	18136.3	14161.2	15144.9	15911.1	15892	16391.2	17422.4	21928.3	17711.1	19252.8	32677.8	20653.3	22321.3	65535	52679.2	34908	25097.5	41462.2	31983.7	38285.9	20092.9	26418.9	32095.4	20863.4
3.69007	25859.1	27794.2	20386.9	12238.7	14928.3	17293.2	17447.7	18359.8	27887.3	14881.6	3.69007	17867.5	28529.7	20675.3	17273	11072	6606.29	13464.8	9232.23	15924.7	13638.4	10126.8	11999.3	14357.9	16109.8	14420.8	21671	15928.2	28003	12310.9	16377.4	26580	17893.5	27619.8	65535	50505.8	31250.4	27707.1	43111.4	29466	37244.9	16622.3	28211.7	26782.9	19516.9
3.82186	24399.5	23970	22195.3	12662.4	13443.7	19695.6	17616	15579.6	36659.6	15332.5	3.82186	15014.6	31569.6	20725.6	21331.1	11507.7	5113.03	18425.6	10119.4	14967.7	14652.8	7169.1	8895.84	12472.6	16606	17311.7	23722.8	18336.5	29221.3	9671.76	13961	22827.3	17725.6	31343.1	65535	45018.6	29835.8	29548.8	61869.5	26309.5	33701.9	16852.3	32321.8	21975.6	16675.4
3.95365	22040.8	22330.9	20136.6	14364.4	12086	20217.2	19247.8	14331.7	32537.5	16820.1	3.95365	15610.7	28678.8	16979.8	23098.4	11490.3	7990.72	19180.7	9056.62	12248.6	15222	6435.9	10598.8	15892.2	17727.3	17933.1	22073.3	20632.9	27261.6	11052.6	13072	21324.7	17407	36226.6	65244.8	46882.6	30245	32550.3	65535	28497.5	31403.8	19119.1	32521.1	17176.5	15242.4
4.08543	21517.5	22697.1	18961.9	14165.7	11763.9	20284.2	20468.4	14850.1	19949.5	20311.6	4.08543	17893.4	26044.8	16615	21964.5	9200.61	12879.1	17759.9	13014.9	13074.7	11654.8	6729.52	11526	16072.6	18573.4	13122.8	21195	24387.1	25430.4	15611.8	14946.2	23714.6	18543.7	34792.3	62489.9	48015.8	35876.3	35849.8	49032.4	38134.4	31504.6	21313.5	31364.6	14584.2	17931.3
4.21722	22035.8	23463.1	17284.4	13574	11561.6	21205.1	20945.7	13578.5	20011.6	25756.1	4.21722	16487.4	23243	19697	21646.4	8274.46	14763	15637.1	17443.8	13921.2	9361.59	9757.73	14299.8	15944.2	17950.3	11863.3	21453.3	25373.7	23974	14653.6	16665.8	24651.9	18220.2	29215.9	64018.6	48887.3	36235.9	34589.9	33538.2	39736.5	28183.1	23533.3	31774	13345.8	19221.2
4.34901	22091.9	24031.4	12875.4	12709.6	9783.84	21189.3	17287.1	12992.7	15913.8	26542.2	4.34901	15303.6	19789.8	23133.7	21561.3	8901.09	12412.9	13359.5	17490.3	15461.4	10109.8	13573	14629.5	19313.2	15343.6	13204.6	19952.4	23210.4	21319.5	9248.76	16422.2	25839.3	17346	22593.2	65233.6	51112.6	34482	33778.1	22342.7	37305.2	23219.1	21129.1	30846	12976.3	15490.8
4.4808	24308.6	21176.4	12861.8	11976.6	11633.5	19277.3	15320.5	13275.2	10905.5	24900.9	4.4808	10693	17465.1	20886.2	19562.8	9924.24	8900.3	16681.1	18821.4	15674.5	11211	18541.2	14859	14392.7	13863.5	15444.3	18874.9	16938.1	17602.5	11236.6	18051.7	28350.6	17057.5	17945.8	65535	59694.1	30932.5	37386.8	19615.2	31530.2	20012.5	15308.1	29768	15408.3	14730.9
4.61259	26940.2	19047	15290	11676.1	14428.2	19757.8	13970.6	14643.8	10582.2	25301.4	4.61259	11779.6	18886.2	18780.6	18372.1	11407.9	8831.12	16886.3	16598.8	15304.3	13184.9	19517.2	19133.5	8500.81	15104.5	13293.3	21729.1	12780.7	22108.3	10249	20426.6	26263.8	14125.1	17577.1	65535	63093.4	31343.3	48992.6	17392.4	24809	19056.8	13759.5	33725.8	15187.9	16381.5
4.74438	25042.2	19132.9	15516.9	11699.9	15715.8	20597.2	14472.4	17084.3	13577.6	29490.8	4.74438	14614.7	22163.7	21317	16990	12381.5	8307.06	14869.3	16998.8	14526.9	14600.6	20583.8	19646	5909.61	17128.5	11526.6	25242.3	12083.5	23058.3	11117.3	17556.3	23801	11757.6	17689.5	65535	62504.7	30943	43005.8	12642.4	18988.5	22217.1	10620.6	31643.1	10826.6	20241.1
4.87616	22946.9	18376.8	16345.7	10593.5	13677.7	26443	18766.4	16642.8	16102.6	25359.7	4.87616	15861.8	23540.7	23502.4	18580.1	10881.4	9298.7	11450.2	20910	12501.6	17235.5	26873.5	20023.6	6089.32	15735.8	10297.3	26892.2	11865	24397	10537.2	16197.9	22580	11967.9	16503	58116.6	52118.7	18936.9	36158.5	11623.6	17483.8	28763	7593.23	31321.2	9684.07	19738.6
5.00795	21503	16478.1	16281.6	11063.8	11337.6	26994.5	22392.9	17205	13600	22999.5	5.00795	17135.8	26293.4	22296.4	18150.8	7377.15	10590.8	12645.4	27493.6	12717.4	19778	32280.7	20615.9	5847.85	13275.8	9166.86	27950.4	12511.7	25771.7	7138.53	14409.4	23323.7	13319.2	13973.6	48730	46168.4	13330.8	37265	11458.7	18080.7	29562.5	7591.4	31393.1	11798.4	19533.1
5.13974	20388.3	18084.2	17204	8991.05	12259.6	28862.4	24302.5	16173.4	16986.9	19784.6	5.13974	14035.5	25519.2	22717	18969.7	4933.7	11245.9	17784.9	26557.1	15410.4	18811.8	29618.6	18669.3	8452.2	11968.5	11491	25210.7	12241	21117.8	5496.71	14544.8	19595.2	15988.6	14208.2	45986.8	41695.9	15461.9	42409.7	10827.5	18652.5	30262.8	8574.42	34580.1	13719.7	19224.2

## Sheet: Fig5_h
Fig5_h
Ctrl	NMIIA KD	NMIIB KD
0.343371	0.344146	0.283614
0.373062	0.366029	0.125309
0.463952	0.339382	0.212776
0.304855	0.341474	0.0840961
0.464443	0.399444	0.146643
0.35066	0.324282	0.284353
0.300908	0.353204	0.21404
0.313605	0.634927	0.144436
0.183516	0.429678	0.113556
0.344024	0.29012	0.106188
0.475276	0.505017	0.125107
0.48209	0.436486	0.110392
0.121353	0.0993338	0.0966792
0.138632	0.570677	0.0934696
0.229988	0.450659	0.107568
0.41375	0.49282	0.118598
0.480052	0.439995	0.101065
0.605427	0.429448	0.100294
0.346268	0.457204	0.150857
0.561785	0.366836	0.144904
0.553922		0.0953434
0.531786		0.112422
0.494949		0.109247
0.442705		0.139643
0.399504		0.11447
0.54387
0.390769

## Sheet: Fig5_i
Fig5_i
Ctrl	NMIIA KD	NMIIB KD
110.478	97.174	124.243
126.467	75.147	123.87
88.91	62.549	133.239
103.705	61.176	145.524
141.49	60.096	147.822
97.924	100.394	66.829
106.285	85.387	71.337
113.895	39.373	130.251
116.005	45.704	106.274
84.561	72.77	111.03
131.591	65.879	100.106
107.121	52.54	85.314
98.3	90.362	87.299
78.993	61.965	91.602
133.668	71.138	92.351
114.777	71.59	84.175
119.483	73.71	94.217
60.478	87.347	100.983
109.915	84.505	94.891
68.836	81.069	65.609
49.581		112.184
66.365		89.28
42.067		91.536
131.067		35.691
96.715		70.665
72.521
109.213
