# Supplementary material for: Myosin II isoforms play distinct roles in adherens junction biogenesis
Source: eLife. 2019 Sep 5;8:e46599. doi: 10.7554/eLife.46599 (PMC6756789; doi:10.7554/eLife.46599)
Supplement: Figure 6—figure supplement 1—source data 1. [file elife-46599-fig6-figsupp1-data1.xlsx]

## Sheet: Figure_6_supplementary_1_b
Figure_6_supplementary_1_b
Ctrl	NMIIA KD	NMIIB KD
1411.16	7736.36	2588.02
1111.75	3501.83	2604.84
1237.68	5560.83	1869.53
2057.23	3775.43	1682.57
2222.35	4225.44	2728.27
2076.25	2751.47	1343.76
2494.07	4106.61	1965.36
1304.15	4401.32	1616.62
1684.87	6199.69	1716.74
3969.61	3598.81	1236.22
990.52	4593.77	1423.91
2751.36	6136.67	1573.67
1932.23	3515.1	1555.17
3400.88	3206.39	1411.37
1440.74	6331.78	2565.13
1081.02	5249.71	1843.09
2354.76	6384.14	1620.18
1976.44	5973.11	1640.35
2874.58	5135.91	2829.12
2790.87	5078.11	2599.3
2588.33	2447.46	2145.64
1241.76		1208.52
1772.76		1922.83
		3393.87
		1604.71
		2984.94
		2957.03
		2446.44
		1563.64
		1357.13

## Sheet: Figure_6_supplementary_1_c
Figure_6_supplementary_1_c
Ctrl	NMIIA KD	NMIIB KD
103	89	54
56	5	65
151	10	34
67	31	83
99	38	80
65	27	45
122	16	46
115	48	136
54	20	49
65	22	30
143	12	78
150	16	67
77	37	90
118	22	150
113	30	65
81	30	92
62	5	74
56	29	84
172	14	89
113	17	159
84	27	50
82	9	148
50	35	120
73	8	71
119	19	122
64	15	115
	43	38
	16	143
	14	166
	6	139
	13	128
	13	109
	10	77
	10	127
	17
	12
	8
	16
	8

## Sheet: Figure_6_supplementary_1_e
Figure_6_supplementary_1_e
Ctrl	NMIIA KD	NMIIB KD
152.523	69.4485	160.607
146.507	54.4555	134.673
191.266	99.6586	102.038
163.958	91.2865	131.633
198.91	76.4799	126.215
83.6387	131.968	201.362
124.645	99.3284	184.2
161.577	116.891	137.156
116.381	78.8016	111.25
265.841	56.8415	187.404
274.995	131.67	137.69
279.249	41.3237	139.609
205.954	62.3324	163.975
130.355	67.6264	178.786
201.406	111.597	111.584
130.14	160.528	179.92
195.265	80.1058	89.2242
97.8627	164.489	67.0745
153.911	75.7254	193.688
144.604	189.191	105.113
83.4729	192.077	117.26
164.355	126.828	165.226
155.937	154.371	135.07
183.63	140.827	138.129
175.034	104.87	93.9019
93.7339	94.7989	94.958
148.075	107.425	203.117
159.424	59.8554	171.548
185.251	32.0813	200.409
159.78	61.7764	143.722
92.3268	100.596	103.022
74.4694	43.9306	82.9577
58.6523	151.978	73.226
88.6615	69.3348	162.373
215.245	113.497	135.305
265.507	137.491	105.807
76.2417	114.532	108.062
77.78	52.1414	109.756
96.9993	90.8359	88.3175
156.599	142.138	122.307
223.323	126.467	149.013
126.302	112.994	109.25
245.659	90.0626	124.324
85.6328	174.776	77.379
142.833	165.408	95.2004
253.088	82.9616	150.123
188.236	88.6635	174.72
174.095	54.242	114.979
142.386	62.6809	78.9168
136.776	101.593	85.1774
161.656	86.9308	154.499
175.812	69.4251	114.63
130.006	53.2125	119.585
93.5937	60.8913	68.2937
67.9629	58.4737	129.025
	51.16	172.272
	34.9893	245.532
	71.8702	162.178
	43.6067	99.4386
	60.5263	236.955
	67.9677	106.262
	60.7786	179.408
	62.0778	201.298
	52.0888	125.446
	98.5658	248.917
		89.3164
		59.2269
		217.993
		250.532
		212.859
		55.2174
		116.961
		162.73
		61.0539
