# Supplementary material for: Myosin II isoforms play distinct roles in adherens junction biogenesis
Source: eLife. 2019 Sep 5;8:e46599. doi: 10.7554/eLife.46599 (PMC6756789; doi:10.7554/eLife.46599)
Supplement: Figure 6—figure supplement 2—source data 1. [file elife-46599-fig6-figsupp2-data1.xlsx]

## Sheet: Figure_6_supplementary_2_c
Figure_6_supplementary_2_c
Ctrl	NMIIA KD	NMIIB KD
833.848	992.069	553.878
794.241	880.353	427.113
623.583	993.219	891.013
936.786	1154.78	439.445
1033.56	962.808	356.05
1181.33	789.642	618.881
792.987	638.423	699.768
704.157	1690.37	501.208
1637.18	881.503	429.203
894.148	1135.14	654.83
1265.45	813.574	687.75
724.64	1187.18	563.702
1089.78	1960.83	634.556
650.023	1218.43	319.577
770.309	852.032	516.047
875.232	1072.22	276.521
771.772	1474.26	528.275
1973.79	1179.34	373.293
1839.19	1280.92	551.057
1316.35	886.31	669.67
939.921	1264.41	325.952
1290.22	1008.79	1027.6
1143.39	1029.8	709.069
1512.61	1149.45	815.246
1664.77	817.963	349.779
2038.48	1410.51	502.253
2169.74	1003.59	372.98
1358.05	1013.53	807.304
2149.62	1454.07	615.223
1705.42	1113.66	549.385
1837.25	851.254	465.16
1456.28	1267.53	519.843
1814.46	904.872	402.073
1674.18	1536.57	337.685
1452.1	695.491	374.14
1367.46	1089.99	546.711
1507.06	1418.32	237.078
2140.79	994.471	307.503
1424.83	1101.35	780.829
790.772	930.083	478.771
1036.13	748.517	498.064
1152.84	826.162	664.362
1069.39	990.61	597.014
799.767	610.862	465.278
1059.1	570.62	516.647
622.107	1327.18	541.384
836.459	934.225	510.729
769.348	806.04	375.915
835.394	584.113	528.246
1151.65	747.806	663.533
1178.76	757.157	521.5
823.084	1216.52	378.283
1014	837.998	336.501
1015.18	877.53	312.237
1191.78	1079.34	311.29
979.203	617.846	345.378
851.609	737.982	494.277
767.336	1414.18	623.764
1007.85
804.62
960.62
725.081
1224.09
1196.28
1150.71
927.597
971.746
1003.59
957.306
1394.3
1141.59
1334.64
1049.63
1002.28
1515.26
928.189
1251.55
1212.02
1094.01
1057.08
804.146
1690.55
1172.84
1212.97
1898.87
1284.81
1189.41

## Sheet: Figure_6_supplementary_2_d
Figure_6_supplementary_2_d
Ctrl_Large	NMIIA KD_Large	NMIIB KD_Large	Ctrl_Small	NMIIA KD_Small	NMIIB KD_Small
17	8	2	60	52	28
31	7	1	96	88	36
24	4	0	89	45	1
16	8	6	55	66	26
13	16	3	26	112	37
22	0	1	92	21	17
22	7	3	48	21	38
32	6	1	105	19	24
13	9	8	50	20	8
23	6	7	37	14	10
24	12	1	114	32	9
13	6	1	68	16	8
22	12	2	56	79	13
28	9	4	105	50	10
19	5	1	68	95	15
14	10	0	70	47	10
29	8	0	114	54	19
10	10	0	61	77	17
15	15	0	37	67	19
17	11	2	56	59	16
18	1	2	46	71	16
43	1	0	108	40	20
16	10	0	58	48	9
16	10	0	91	70	19
17	10	0	79	47	20
16	0	0	90	42	13
	11			63

## Sheet: Figure_6_supplementary_2_f
Figure_6_supplementary_2_f
Ctrl	NMIIA KD	NMIIB KD
198.347	63.1651	82.1651
177.539	77.346	79.2108
115.428	76.8953	101.367
140.062	81.2068	150.957
124.733	83.7869	87.6424
101.917	81.5517	93.8995
148.277	89.686	81.2373
149.135	92.356	93.9885
137.008	118.454	109.251
149.708	77.5912	98.7531
116.016	77.2297	100.359
150.287	85.5252	80.8765
155.117	78.7575	101.554
146.885	88.1434	107.927
176.515	69.1905	94.0112
178.027	71.2228	100.011
184.162	74.7834	162.136
147.283	87.8701	83.2586
152.585	88.4153	86.4511
151.297	83.439	141.077
130.808	106.112	85.5004
169.438	82.7594	77.7166
149.792	75.2515	78.8953
169.921	94.0346	88.0116
169.932	79.9853	89.9987
139.663	78.7253	97.0598
122.15	75.9949	81.2203
123.007	76.7572	99.0829
130.107	82.0897	95.7305
122.537	96.0879	91.153
122.969	76.5566	102.605
139.386	58.8534	100.114
172.738	63.2863	163.312
144.525	86.8724	122.61
143.059
160.167
148.7
138.072
172.373
168.121
143.87
110.409
206.493
151.173
219.438
226.858
