# Supplementary material for: Myosin II isoforms play distinct roles in adherens junction biogenesis
Source: eLife. 2019 Sep 5;8:e46599. doi: 10.7554/eLife.46599 (PMC6756789; doi:10.7554/eLife.46599)
Supplement: Figure 6—figure supplement 3—source data 1. [file elife-46599-fig6-figsupp3-data1.xlsx]

## Sheet: Figure_6_supplementary_3_b
Figure_6_supplementary_3_b
Junction Center				Junction Periphery
Ctrl_Center_Parallel	Ctrl_Center_Perp	NMIIB KD_Center_Parallel	NMIIB KD_Center_Perp	Ctrl_Periphery_Parallel	Ctrl_Periphery_Perp	NMIIB KD_Periphery_Parallel	NMIIB KD_Periphery_Perp
55.2069	193.238	37.9461	108.136	203.571	211.7	68.9375	116.823
105.57	226.6	300.109	213.477	244.214	150.206	266.528	73.0345
349.231	224.304	122.415	155.269	380.415	273.999	114.323	217.525
364.408	48.7626	96.58	48.3417	279.286	81.099	123.937	103.873
326.041	27.4181	87.7829	70.4543	441.367	81.8086	123.85	65.9349
36.8605	102.135	78.2751	101.265	82.7151	71.7871	91.2282	145.628
89.066	40.5102	315.431	382.117	124.829	73.8188	338.808	326.408
38.9756	41.8748	94.6265	546.054	120.008	41.7679	159.994	465.384
85.398	72.4401	162.667	290.957	178.599	28.0317	256.755	411.289
76.2406	81.6338	190.863	460.036	302.995	325.743	200.184	402.303
98.2468	22.0122	190.4	129.973	209.41	96.853	296.167	184.576
64.5049	47.8653	207.641	93.6998	220.103	265.418	192.407	55.8266
197.602	346.272	132.967	76.052	172.864	142.938	355.556	89.4901
136.883	91.1032	102.897	343.263	175.583	207.343	244.51	181.459
220.547	166.328	183.839	81.1769	400.659	208.254	358.562	129.547
85.5179	141.402	150.619	54.6592	396.035	329.736	263.971	73.3037
235.562	179.162	85.7998	36.5973	423.758	336.013	197.943	89.0176
404.702	189.256	224.231	114.751	510.097	203.576	237.555	234.323
186.56	134.976	229.793	41.1587	401.216	228.387	135.784	23.8534
80.9083	212.867	226.832	128.937	171.839	476.703	217.118	197.614
79.2401	248.107	304.204	279.455	227.076	345.231	282.133	116.842
327.779	232.057	135.82	194.842	584.72	200.93	365.347	159.539
233.129	265.504	167.659	116.899	427.421	106.066	124.932	206.315
255.387	263.19	46.0403	179.653	422.913	163.205	73.6044	209.472
158.449	172.201	88.4908	128.76	144.048	130.176	215.344	182.495
90.1936	72.8768	128.639	149.465	297.535	313.31	260.274	166.653
135.863	73.2921	134.571	200.937	272.83	205.689	111.466	235.301
153.852	58.2148	93.3649	40.0717	264.947	118.737	261.583	206.489
140.843	145.987	333.669	203.658	211.38	84.723	311.021	274.068
295.945	377.252	286.86	187.984	167.956	198.821	699.53	356.101
160.789	319.552	175.542	113.88	132.664	250.706	283.047	70.7133
254.5	102.382	125.497	93.1522	344.865	139.971	376.213	91.0119
25.9666	116.023	27.28	31.1122	70.8977	88.9446	113.959	51.197
39.3667	165.98	186.35	75.9093	88.2948	144.501	87.2187	109.435
84.4748	44.5344	76.1235	363.029	80.8307	27.783	151.593	210.602
19.4249	20.087	118.093	328.035	16.1191	30.1087	397.547	140.513
290.592	331.469	208.083	140.267	264.345	236.57	378.464	113.414
255.884	199.917	166.898	234.903	133.696	127.041	252.371	268.466
36.521	136.864	110.998	394.737	38.577	87.8013	244.38	228.704
405.413	98.7194	191.946	294.25	371.37	199.808	428.612	134.634
223.556	182.064	51.0139	290.783	274.899	382.744	83.8469	196.568
76.3049	161.22	192.462	54.6046	174.541	82.1525	255.812	143.552
137.646	11.4053	97.522	28.6394	154.132	64.9772	52.8568	33.4516
451.617	206.599	9.86031	12.0418	453.646	149.459	26.8635	41.5875
266.612	342.916	149.686	58.53	262.284	356.918	101.759	27.5502
89.6376	110.637	120.103	60.2675	120.758	468.034	147.01	165.957
195.293	103.652	37.3016	27.6505	381.044	375.078	81.2022	22.1311
299.958	147.375	27.5868	38.4938	223.153	278.079	18.7211	54.882
48.0367	48.657	391.891	425.013	185.197	87.5588	464.116	179.837
83.9441	95.8036	91.0009	172.084	172.607	199.32	257.513	100.18
33.1851	149.47	62.8996	284.382	69.1463	120.632	505.419	167.296
112.855	124.095	195.011	211.584	169.609	172.267	225.854	242.27
72.7053	51.6165	65.9104	414.168	174.68	180.93	112.511	132.511
182.57	188.946	98.3555	101.704	126.341	74.2326	243.815	171.855
331.091	224.729	141.132	110.466	235.699	203.867	180.309	179.846
264.827	59.8889	60.6061	130.101	274.132	70.7547	41.0372	157.807
221.227	231.135	46.9981	100.324	182.082	263.23	99.1556	71.683
114.439	126.164	97.0227	466.37	90.8308	108.796	164.926	359.176
53.0929	127.953	111.963	129.78	71.0545	73.9873	433.443	94.3065
108.104	86.2053	157.138	380.316	251.397	93.2153	147.574	319.676
196.877	215.941	133.585	289.029	441.787	445.303	317.425	257.374
538.501	172.869	96.4339	120.24	616.407	207.136	211.85	101.096
618.563		116.497	336.503	881.791	214.023	161.947	540.03
299.373	72.6248	126.839	242.627	792.749	197.65	384.256	419.046
355.154	95.6785	53.5165	431.352	468.292	222.117	86.3582	331.168
316.016	121.255	64.3086	627.592	706.158	179.711	113.325	539.839
105.507	222.515	200.644	494.786	172.66	174.864	254.335	447.664
132.327	236.3	218.132	284.997	212.821	249.726	236.161	519.19
7.24889	129.493	69.3049	152.962	3.81845	128.278	201.109	142.793
68.695	279.305	166.511	76.126	112.834	135.895	252.313	236.27
273.497	57.9346	51.0702	115.871	269.165	155.5	181.515	158.814
390.84	179.977	98.3514	290.833	508.171	65.4091	185.096	261.286
513.761	58.5476	148.533	164.664	358.312	119.695	164.628	196.647
238.985	198.16	156.048	159.171	399.038	290.439	115.374	60.195
194.907	94.5349	197.401	73.1034	841.11	88.2411	189.047	121.692
65.6424	23.8712	28.5315	124.586	248.691	308.021	43.6449	157.696
93.839	93.5365	159.096	101.305	221.443	85.1082	99.1124	53.9498
311.002	96.5849	173.317	379.538	399.74	238.745	174.428	313.003
175.409	89.7163	187.034	59.5286	305.665	362.358	135.438	92.485
191.626	118.615	242.254	128.261	373.062	214.02	195.505	136.293
225.313	285.907	266.153	28.8057	434.137	126.215	277.282	27.4961
84.9221	243.148	127.01	65.467	370.229	114.549	97.4015	63.1218
103.747	45.1175	159.822	33.7243	244.788	160.605	203.371	58.0377
155.491	445.748	37.1204	227.146	301.067	245.03	50.0292	256.03
108.388	175.344	170.659	116.143	353.684	168.102	85.4194	148.781
179.984	183.012	197.108	130.676	450.904	88.0869	187.828	218.709
92.8509	387.599	105.447	47.7171	139.261	261.412	215.989	136.724
122.05	214.944	390.454	153.409	136.394	471.722	228.279	216.737
283.873	529.749	140.827	209.053	170.623	120.777	56.4904	231.897
360.299	122.201	140.651	125.293	494.951	193.462	263.058	217.544
277.636	245.787	59.2262	29.7476	563.575	110.312	35.811	107.585
376.849	121.687	233.525	506.519	555.06	167.658	223.29	374.63
69.2528	75.2379	165.322	434.553	266.426	145.352	199.955	183.243
128.673	256.117	145.975	131.419	190.275	170.408	185.563	166.493
158.977	179.726	142.513	256.711	292.027	115.873	425.745	466.602
194.684	139.825	287.163	87.4479	362.793	110.294	149.919	141.881
110.777	14.2414	85.9	186.595	206.516	86.4612	89.0745	62.9567
142.26	84.8975	155.462	84.8494	405.021	243.795	189.442	284.623
137.992	120.682	281.035	453.742	155.447	29.4242	236.586	241.288
172.555	194.121	33.4823	158.662	105.643	140.617	41.2066	118.613
219.994	120.377	39.9246	222.86	338.923	66.8784	52.7305	236.577
121.701	56.8729	115.921	50.7828	173.111	38.2416	96.2304	36.3044
249.738	84.7368	200.554	63.253	285.057	208.8	127.263	50.3986
54.1112	23.347	255.236	154.459	157.744	145.97	170.282	200.583
563.303	344.358	153.558	384.016	387.343	326.214	264.347	407.546
107.227	69.9034	336.234	185.968	276.212	66.9866	383.582	107.884
84.8673	139.481	142.871	63.2062	55.4471	126.873	214.246	102.14
32.9593	93.9713	81.0545	146.626	89.2461	112.281	43.5045	102.038
181.248	148.33	319.879	207.181	446.512	301.458	278.633	145.386
239.85	48.5067	651.001	223.718	536.18	515.278	454.274	195.492
251.486	73.2625	416.147	334.936	571.073	429.233	371.862	209.947
126.629	63.4674	127.509	326.982	305.566	257.667	513.198	157.671
225.647	266.358	327.189	69.2036	404.054	195.149	240.33	164.767
69.8536	339.496	746.046	212.8	206.849	110.168	358.894	242.847
11.98	110.393	242.743	265.382	8.82809	132.403	147.2	352.964
143.337	85.8465	158.102	348.515	125.056	66.1168	293.201	270.289
112.22	50.3461	196.796	149.607	143.907	59.8504	174.68	59.5878
291.919	362.185	100.328	202.116	112.977	224.301	99.7572	214.596
131.286	82.5505	132.74	623.211	128.635	167.859	225.37	269.484
133.985	228.709	370.034	235.97	60.0105	86.8107	441.58	577.258
248.856	129.207	253.674	214.949	270.378	139.585	255.473	285.204
395.462	54.6334	199.404	624.301	333.647	101.625	249.099	285.332
281.287	133.156	131.101	500.274	363.202	73.4317	392.491	180.058
125.3	84.3917	114.174	491.634	335.831	242.369	337.301	402.983
156.918	314.935	132.849	386.047	85.7838	121.628	496.083	290.389
154.768	77.2964	35.9125	26.6377	553.603	153.533	25.4739	35.1516
		297.1	695.694			311.42	576.284
		71.0028	175.837			62.7424	92.7929
		352.101	86.2904			382.993	385.115
		354.44	368.203			188.037	349.089
		82.3867	297.513			121.505	183.812
		79.8463	184.312			206.99	349.78
		174.861	242.037			321.336	109.615
		100.988	137.891			375.935	107.222
		98.5351	80.6303			114.264	75.038
		46.2183	16.4761			50.2705	19.1545
		202.114	326.902			211.268	270.88
		153.422	233.838			245.018	265.486
		238.754	172.576			241.544	128.436
		245.615	101.402			490.457	43.7596
		291.362	222.669			285.18	146.518
		309.5	124.097			199.583	148.509
		202.981	174.949			344.358	189.792
		252.456	290.92			322.072	472.726
		132.554	295.025			319.884	502.822
		187.04	264.568			386.589	584.869
		272.997	310.574			481.778	297.99
		111.27	222.019			188.335	71.0094

## Sheet: Figure_6_supplementary_3_c
Figure_6_supplementary_3_c
Ctrl_Center	Ctrl_Periphery	NMIIB KD_Center	NMIIB KD_Periphery
0.285695	0.961599	0.35091	0.590102
0.465886	1.62586	1.40581	3.64935
1.55695	1.38838	0.788403	0.525561
7.47311	3.44377	1.99786	1.19316
11.8915	5.39512	1.24595	1.87837
0.360899	1.15223	0.772972	0.626448
2.19861	1.69102	0.825483	1.03799
0.930763	2.87321	0.173291	0.343791
1.17888	6.37134	0.559077	0.624269
0.933934	0.930168	0.414887	0.497594
4.46328	2.16214	1.46492	1.60458
1.34763	0.829271	2.21602	3.44651
0.570656	1.20936	1.74837	3.97313
1.5025	0.846823	0.29976	1.34747
1.32597	1.92389	2.26467	2.76781
0.604784	1.20107	2.7556	3.60106
1.3148	1.26113	2.34443	2.22364
2.13839	2.50569	1.95406	1.01379
1.38217	1.75674	5.58309	5.69246
0.380089	0.360474	1.75925	1.0987
0.319379	0.657751	1.08856	2.41465
1.4125	2.91007	0.697076	2.29002
0.878064	4.02975	1.43422	0.605539
0.970351	2.59129	0.256273	0.35138
0.920141	1.10657	0.687256	1.18
1.23762	0.949649	0.860662	1.56177
1.85372	1.32642	0.669718	0.473714
2.64283	2.23137	2.32995	1.26682
0.964763	2.49496	1.63838	1.13483
0.784477	0.844761	1.52598	1.96442
0.503172	0.529162	1.54146	4.00274
2.48578	2.46383	1.34722	4.13367
0.223806	0.7971	0.876828	2.22589
0.237178	0.611034	2.45491	0.796989
1.89684	2.90935	0.20969	0.719805
0.967038	0.535363	0.360003	2.82926
0.876681	1.11741	1.48348	3.337
1.27995	1.05239	0.710498	0.940049
0.266841	0.439367	0.281194	1.06854
4.10672	1.85864	0.652322	3.18353
1.2279	0.718232	0.175436	0.426553
0.473298	2.1246	3.52464	1.78202
12.0686	2.3721	3.40517	1.5801
2.18596	3.03525	0.81884	0.645951
0.777487	0.734858	2.55742	3.69358
0.810195	0.258011	1.99283	0.885832
1.88411	1.01591	1.34904	3.66915
2.03533	0.802482	0.716656	0.341115
0.98725	2.11512	0.922069	2.58076
0.876211	0.86598	0.528818	2.5705
0.222019	0.573202	0.22118	3.02111
0.909425	0.984568	0.921673	0.932243
1.40857	0.965457	0.159139	0.849064
0.966257	1.70196	0.967075	1.41872
1.47329	1.15614	1.27761	1.00258
4.42197	3.8744	0.46584	0.260047
0.957136	0.691723	0.468464	1.38325
0.90707	0.834876	0.208038	0.45918
0.414939	0.96036	0.862711	4.59611
1.25402	2.69695	0.413179	0.461636
0.911713	0.992103	0.462184	1.23332
3.11508	2.97585	0.802011	2.09552
0.904914	4.12008	0.346201	0.299885
4.12219	4.01087	0.522773	0.916978
3.71195	2.10831	0.124067	0.260769
2.60621	3.92941	0.102469	0.209924
0.474155	0.987394	0.405516	0.568138
0.559994	0.852214	0.765384	0.454865
0.0559792	0.029767	0.453086	1.4084
0.24595	0.8303	2.1873	1.0679
4.72078	1.73097	0.440751	1.14294
2.17161	7.76911	0.338172	0.708403
8.7751	2.99355	0.90204	0.837176
1.20602	1.37391	0.980382	1.91668
2.06174	9.53195	2.7003	1.55348
2.74986	0.807384	0.229011	0.276767
1.00323	2.6019	1.57046	1.83712
3.21999	1.67434	0.456652	0.55727
1.95516	0.843545	3.14192	1.46443
1.61552	1.74312	1.88875	1.43444
0.788064	3.43967	9.23959	10.0844
0.349261	3.23205	1.94006	1.54307
2.29948	1.52416	4.73908	3.50412
0.348832	1.2287	0.163421	0.195404
0.618145	2.10399	1.46939	0.574129
0.983451	5.11886	1.50837	0.858802
0.239554	0.532725	2.20983	1.57975
0.567824	0.289141	2.54518	1.05326
0.535864	1.41271	0.673644	0.243601
2.94841	2.55838	1.12258	1.20921
1.12958	5.10893	1.99096	0.332863
3.09687	3.31067	0.461039	0.596028
0.920451	1.83298	0.380441	1.0912
0.502399	1.11658	1.11075	1.11454
0.884557	2.52023	0.555149	0.912438
1.39234	3.28932	3.28382	1.05665
7.77855	2.38854	0.460355	1.41485
1.67567	1.66131	1.83221	0.665589
1.14343	5.28298	0.619372	0.980514
0.888904	0.751283	0.211029	0.347403
1.82754	5.06774	0.179147	0.22289
2.13988	4.52677	2.28269	2.65065
2.94722	1.36521	3.17066	2.52512
2.31769	1.08066	1.65245	0.848935
1.63581	1.18739	0.399874	0.64863
1.53393	4.1234	1.80803	3.55549
0.608451	0.437029	2.26039	2.09758
0.350738	0.794845	0.552796	0.426355
1.22192	1.48117	1.54395	1.91651
4.94468	1.04056	2.90992	2.32375
3.43267	1.33045	1.24247	1.77122
1.99519	1.18589	0.389956	3.25487
0.847157	2.07049	4.72792	1.4586
0.205756	1.87757	3.50586	1.47786
0.108522	0.0666761	0.914694	0.417038
1.66969	1.89144	0.453645	1.08476
2.22897	2.40445	1.31543	2.93147
0.805994	0.503685	0.496391	0.46486
1.59037	0.766328	0.212993	0.836302
0.585831	0.69128	1.56814	0.764961
1.92602	1.93702	1.18016	0.895755
7.23846	3.28311	0.319403	0.873014
2.11246	4.94611	0.262059	2.1798
1.48475	1.38562	0.232234	0.837011
0.498255	0.705299	0.344126	1.70834
2.00227	3.60575	1.34818	0.724688
		0.427056	0.540393
		0.4038	0.676156
		4.08042	0.99449
		0.962621	0.53865
		0.276917	0.661031
		0.433213	0.591772
		0.722458	2.93151
		0.732376	3.50613
		1.22206	1.52276
		2.80518	2.62447
		0.61827	0.779935
		0.656104	0.922901
		1.38348	1.88065
		2.4222	11.208
		1.3085	1.94637
		2.49402	1.34391
		1.16023	1.8144
		0.867786	0.681308
		0.449297	0.636177
		0.706962	0.660985
		0.879006	1.61676
		0.501172	2.65226

## Sheet: Figure_6_supplementary_3_e
Figure_6_supplementary_3_e
Time	Ctrl_Parallel																												Time	Ctrl_Perpendicular
0	3272.27	4067.3	5473.55	4060.02	1631.94	2347.36	2300.74	2160.99	2120.81	3816.69	4519.98	4807.26	1704.18	1885.94	1762.05	1127.94	1822.44	6454.53	1734.9	8318.24	1138	1526.12							0	1091.8	-845.676	864.472	1205.99	3448.74	295.593	1825.49	1424.82	-365.45	3106.94	-718.388	410.262	3320.82	-680.63	2371.73	2197.52	1181.51	258.292	2904.6	575.659
0.5	2899.65	3943.66	4335.76	3587.84	1920.51	834.891	3081.71	3037.39	2003.5	4503.86	2651.55	4314.38	-198.726	-488.253	2248.47	2025.19	3880.95	4113.07	1740.26	6377.72	138.575	1891.55							0.5	3911.95	481.176	3164.01	3478.22	5832.78	2866.97	3295.03	1342.44	467.398	3737.51	2577.09	2212.82	4424.5	3936.91	2605.72	3346.2	1158.77	1519.42	2720.78	3092.74
1	3545.22	1820.17	4052.51	883.413	2816.35	2771.28	2457.15	3058.85	2210.93	3702.28	4202.2	4351.48	4795.43	2927.27	2377.59	4042.82	5496.64	2845.97	1459.25	4762.94	2431.99	4566.82							1	2462.65	2873.38	2216.02	4699.05	4412.75	1386.9	2965.57	901.468	2537.22	1793.15	1117.97	1520.84	-1003.68	-87.2966	2670.74	680.076	313.385	2632.17	3186.26	4353.84
1.5	3524.18	2281.93	4274.9	1559.76	1794.94	1487.06	1984.18	2270.17	3641.45	2880.53		1112.73	6360.6	1301.12	1349.23	4191.29	3197.04	2051.73	2252.14	4815.79	1263.96	5859.62							1.5	2351.09	2561.69	1996.84	4754.88	5011.91	1753.77	2010.66	2607.02	1043.1	722.444		3419.83	-1436.1	2424.82	3923.84	260.866	1303.05	2617.68	3063.54	5245.72
2	3348	4365.44	4400.26	4238.49	2560.56	2059.87	3644.11	1695.74	3609.03	3385.66	4611.9		6015.64	-1877.03	3868.99		1667.61	1483.12	5903.09	5588.98	2185.01	5358.9							2	1267.31	366.909	1448.41	2503.66	5585.13	455.77	2097.22	3473.5	2012.96	1420.24	1829.76		-1291.35	5161.74	1507.73		3226.92	3348.48	-550.051	5048.86
2.5	4810.17	1607.55	4609.84	5252.29	3563.53	290.544	2470.07	3931.83	1656.52	4408.05	4599.34		6158.34	-586.677	4174.01		2879.78	3558.42	1221.68	5772.67	148.393	5309.2							2.5	1214.93	2533.03	1554.19	1557.17	4409.78	2723.09	4218.65	3209.39	2836.41	2012.18	1872.63		283.082	5748.59	1388.86		2013.08	808.053	3705.05	4242.49
3	4195.06	-373.821	5477.09	4234.38	1907.14	1752.02	2271.99	3072.46	2812.17	5080.48	5303.78		8156.07	3701.05	1065.45		4053.99	2635.08	-1890.87	5869.95	-334.279	6177.2							3	1359.54	4408.42	1646.66	1683.27	4788.58	1234.9	2581.95	2780.93	2228.39	1923.36	1104.42		-1100.78	286.706	3069		1405.26	1184.15	7263.19	3931.77
Time	NMIIA KD_Parallel																												Time	NMIIA KD_Perpendicular
0	539.919	2971.93	2349.83	1394.22	2369.65	1640.8	4718.26	1972.13	1702.28	900.279	1015.53	408.426	1150.56	2046.56	2871.64	2187.01	1538.49	2880.56	1801.28	859.243	1431.65	576.877	-151.124	2598.22					0	1935.34	694.496	6.22243	732.791	3720.11	1767.07	286.858	1313.42	507.878	426.565	638.134	441.732	1538.82	254.245	604.609	1026.96	983.067	1213.15	440.032	347.35
0.5	2090.63	4800.99	1376.75	629.646	2720.07	1480.15	1952.31	1844.47	1090.08	1207.73	4396.46	980.73	3496.98	697.499	2009.89	2110.66	1101.03	1193.28	1146.98	665.909	916.972	469.299	-96.5392	2199.65					0.5	-224.929	2432.52	2797.62	910.897	1414.41	2332.54	992.055	813.087	1154.09	448.848	592.458	740.911	1309.7	1046.93	1668.36	3437.17	1435.45	4204.74	1199.6	1159.58
1	398.693	4721.11	1158.8	219.43	976.493	1686.37			413.259	419.694		-2096.91	3526.49	409.63	1675.87	1999.1	1752.18	1401.14	781.77	1230.58	696.496	675.147	492.787	3057.85					1	1893.06	2860.57	2979.61	1539.79	1926.98	999.837			1315.84	349.787		1353.28	537.695	1631.85	1814.61	3304.64	541.612	4697.94	1438.49	1190.7
1.5	532.833	5324.59	50.5093	526.379	1037.57	1592.91								177.643	1655.61	3050.56		2236.55	1034	1125.98	478.361	1266.5		3177.59					1.5	1029.64	200.738	2349.71	1271.61	1235.01	1380.27								1375.72	647.49	2986.72		4172.1	1408.72	1303.29
2	634.537		3883.41	335.925	545.894	979.904								1111.97	1874.98	5308.39		2701.14	1089.48		821.565	702.02							2	1989.12		484.045	2053.53	1384.53	1854.59								708.378	1225.37	1274.72		4248.59	1382.82
2.5	1657.82			175.281	582.758	1550.53								667.029	1551.52	5401.42		3389.55	1092.02		1081.99	564.702							2.5	495.055			1581.85	1352.6	2264.68								1124.01	1886.51	385.93		4343.99	1930.07
3	920.69					957.987								591.108	564.422	4537.47		2079.84				657.826							3	1100.36					2740.55								1317.4	2861.99	1682.97		5522.52
Time	NMIIB KD_Parallel																												Time	NMIIB KD_Perpendicular
0	1048.89	2182.14	1510.09	2790.26	3146.18	1257.46	918.896	3999.14	2323.93	3402.87	3205.55	4307.64	1867.24	2545.76	1887.29	3221.61	5122.12	3734.72	1998.77	2658.28	4120.31	1924.86	2447.3	3212.77	1930.78	4512.74	1550.4		0	795.369	-328.31	668.612	1215.85	2135.5	3288.55	3458.21	914.757	567.059	447.717	2941.68	4749.93	2567.93	632.678	602.82	18.3986	-310.526	255.374	854.166	1956.12
0.5	898.11	2308.89	2803.2	2009.58	2857.95	4179.34	1218.5	3296.45	2519.67	4211.44	2994.47	2345.94	-241.681	1481.81	-143.873	2837.68	5963.35	2772.39	1590.62	3615.19	1023.09	6042.78	2664.36	489.797	2244.96	3544.01	1898.69		0.5	1377.24	2290.67	711.463	1853.59	2372.31	2312.26	4269.05	1228.05	1268.49	2049.86	4264.17	2977.65	7371.88	2139.45	2445.91	2241.42	46.5999	1304.57	1731.91	1650.17
1	1429.3	359.168	1201.93	1901.64	2278.64	4905.23	2423.79	3020.36	971.106	3168.13	1795.18	1813.35	2872.62	2436.11	3076.52	2775.43	3989.26	1021.11	1449.24	588.64	7537.38	3801.92	1787.59	1538.75	285.869	5155.52	1106.29		1	2519.19	4968.11	2075.8	1180.17	2939.58	1302.57	3847.77	2058.29	2101.83	1788.57	3990.57	5949.85	5812.6	1926.55	1421.53	1528.17	2824.84	2724.05	2343.66	2097.87
1.5	1715.63	778.24	4847.48	3731.34	3243.3	5051.16	2251.49		1433.39	5956.18		4642.07	-855.324	2423.09	673.522	1052.16	5226.56	3413.05	1264.71	-233.725	7471.53	2876.92	2918.46	-80.1034	4661.23	6870.72	1669.4		1.5	1294.18	4199.85	-82.5024	1347.03	1491.66	1521.26	5006.57		379.691	3092.41		2495.11	8938.15	1828.17	1779.43	274.915	1987.54	3481.06	2858.57	3699.58
2	1853.88	1251.63	2775.43	1780.36	3927.48	6744.3	2759.51		1264.95	3611.36		3324.04	-59.9596	2541.82	615.787	723.475	4274.48	1760.48	288.546	2898.98	7233.68	4196.41	4522.8	-284.334	2523.59	7163.85	1697.64		2	555.663	4403.61	2143.62	1754.68	1953.37	35.1501	4649.73		2016.71	2469.25		5390.78	8441.73	1378.51	2250.79	906.793	2294.38	3588.82	993.338	879.758
2.5	936.882	4726.89	1591.24	2928.16	2592.63	5320.77	3286.6		967.008	3323.76		5788.36	-880.808	881.06		3735	2549.54	2750.04	1057.62	2229.24	5391.63	1514.46	6220.4	4718.04	541.598	5986.08	4943.03		2.5	1307.26	308.585	16.9801	1180.93	2797.93	1529.78	3987.57		1695.37	2504.87		4076.67	9415.72	2440.04		45.4323	4075.98	3406.91	3018.01	474.073
3	1273.22	1060.09			2137.61	1663.64	3751.02		813.667	3483.38		5400.54	395.762	1448.23		-505.649	3948.55	2391.6	2057.21	384.286		811.052	7341.06	2251.05	-376.623	3323.57	8265.84		3	627.602	2940			3149.57	5368.36	3722.75		518.476	2736.08		1929.38	8522.17	1602.73		1968.09	2832.55	2035.47	1215.62	1399.7
[truncated: 7 more columns]
