# Supplementary material for: Myosin II isoforms play distinct roles in adherens junction biogenesis
Source: eLife. 2019 Sep 5;8:e46599. doi: 10.7554/eLife.46599 (PMC6756789; doi:10.7554/eLife.46599)
Supplement: Figure 6—source data 1. [file elife-46599-fig6-data1.xlsx]

## Sheet: Fig6_b
Fig6_b
Time	Ctrl_Doublets																							Time	NMIIA KD_Doublet
-1																								-1
-0.5																								-0.5
0	47746.2	18752	20401.3	108598	84484.6	26615.3	50675	65409.2	25643		130682	14286.3	33285.3	62566.5	40453.7	32584.7	55262.2	16467	61062.3	79751.9	131004	64721.7		0	26224	111776	66735.1	29527.2	212011	33751.5	26060.6	149614	57591	32614.8	26066.3	33311.9	28661.5	33292.5	57061.2	60802.2	65758.1	41966.4	54817.2	5588.11	23404.5	8294.02	30856.4	17285.7
0.5	87861.6	88086.6	78168	54405.2	34189.8	47133.7	99625.1	30717.3	107641	45313	164603	4232.53	52944.8	57912.5	5445.37	33497.3	49556.7	20701.5	81745.1	48694.1	137753	48092.8		0.5	53011.2	104536	78765.7	22282.8	16568.1	28759.4			26421	34362.9	20749.7	33580.7	34428.7	21062.4	50809	71235.3	25812.1	30498.8	40117.8	1816.45	21279.9	17420.4	37153.5	28663.8
1	51582.2	93126.6	68014.3	54166	125020	36247.2	57763.1	31063	62074.5	78887.3	182816	36695.8	25596.9	66331.1	19346.6	19714.5	31582.7	11891.4	47488	35374.8	91429.5	38887.2		1	63901.4	94486.1			68555.2	18964.5			31371.8	5323.89		28782.7	49262.4	11447.6	20045.8	98196.1	21940.6	51035.5	47661.8	20249.7	22267.8	28620.2	60028.7	47113.4
1.5	87909.2	127059	72354.9	61701.5	67807.2	35099.1	46154.1	55669.4		180813		21294.1	30609.3	65951.7	26288.6	2798.13	35616.5	22160.4	48433.4	29355.2	54759.7	41026.8		1.5	38969.9	39798.2			47543.8	56715.6								9528.48	28165.7	73102.9		47204.8	46313.1	14512.2	25499.8	28376.8		39779.6
2	61891.1	64448	124320	48199.8	96318.8	133551	63597.8	89057.8	44127.9	112495	137497		60058.9	62337.5	31692.3		43354.9	37096.3	17084.5	66668.7	138805	45883.8		2	40201.4					40014								18808.6	24725.2	109490		108465	42326.4		13012.6	23442.8
2.5	47776.4	219242	97832.4	38554.1	66103.8	157555	105674	73302.9	39643.3	109193	99675.3		31038.4	133961	9463.97		31369.2	43326.9	33316.5	24513.6	170578	54076.7		2.5	33362.2				67693.3	7477.67								21286.2	38570.5	14239.2		115459	28604.6		11326.1	25380.4
3	121707	312864	74108.7	16710.8		54661.6	68673.6	71223.9	55980	106430	163544		22309.6	70986.3	35712		51856	46609.4	63344.9	12546.8	150245	33273.4		3	37173.6					61746.6								8023.27	48409.6	72328.8		118739				26315.2
Time	Ctrl_Cell1																							Time	NMIIA KD_Cell1
-1	87012.7	58245.5	95666.3	18287.9	127083	10912.5	10391.3	31861	35514.9	43930.2	41206.7	65765	78050.5	23398.6	36604.5	19709.7	17630.7	5416.91	105139	67618.5	92289.4	12439		-1	83786.7	16127.3	41651.2	20919.7	131038	89891.5	179514	85767.6	41327.3	15525	25752.9	50520.5	35253.1	18161.7	55260.8	89438.2	61340.5	80459.2	29785.6	6718	12721.8	12715.2	34398.2	11951.5
-0.5	67303.2	34507.6	106537	8195.34	139425	23503.4	67215.7	47227.5	82321.5	42256.8	31221.5	78567.9	67016.1	30544.8	25736.8	39698.7	25213.2	40793.2	124273	98424.6	121066	6365.15		-0.5	74731.5	94267.6	48631.8	22989.1	37169.2	50124.2	9801.62	135389	61876	7976.31	6217.19	27389.1	20000.8	27391.6	70334.5	62632.6	69141.4	70704.9	32716.5	5812.53	10311.8	14002.9	27863.9	19139.2
0	99027.5	36196.6	158053	58937	166506	27024.1	130954	35780.4	34498		52125.5	76857	80189.1	33255.8	76376.3	79539.4	24861.7	51270.6	125841	99621.1	89094.2	12650		0	108567	210021	80131.1	66824.2	235879	122564	134018	195555	61121.7	20591.8	43131.2	22397.4	96765.4	42785.1	106098	84339.9	78076.3	93770.7	36214.3	23965.5	13093.6	15387.4	9178.97	41170.1
0.5	260872	127617	215461	128641	240483	161736	224544	104170	70351.1	173385	122908	138656	98938.3	96666	88567.9	150370	53470.2	69623.3	150934	112794	84924.3	41912		0.5	100130	251478	144884	46507.8	75218.5	100850			55245.5	4143.55	94364	36017.6	61066.2	53711.1	235062	204872	76819	168220	55555.4	52641.7	27449.5	47919.6	31794.4	90498.8
1	144118	217075	228021	192186	193846	115509	235352	115284	162885	248200	45685.2	151434	41022.9	78674.6	102390	77032.7	43932.8	79082.7	153365	140076	57449.9	74875.6		1	83391.8	98617.1			32751.1	67144.9			57171.2	11528.9		42400.2	68752.8	76025.2	148142	265100	66771.2	208489	71729	36210	23037.6	38788.6	28599.1	107041
1.5	183628	188110	233603	250199	261220	139032	128644	180666	78135.8	178098		122829	63602.6	86845.9	118544	53762.3	47787.9	106098	138027	179689	39420	68625		1.5	44489.3	52254.6			58680.8	117560								63422	108580	209567		187712	61713.2	43185.4	18081.2	47277.9		66778.3
2	85214.9	213081	202794	218819	317831	83966.6	214708	248398	116342	171008	83425.1		91539.9	96603.6	122869		55925.8	108416	87130.8	124376	9787.29	97589.4		2	121240				154283	108443								63207.2	89716.2	145662		231165	68624.2		4335.44	64231
2.5	120572	267772	238602	159555	329146	177044	148550	336154	156093	306638	93838.4		30680.9	117733	94779.1		71635.5	63685.9	181697	169113	46634.8	176079		2.5	22295.5				54215.9	137746								53365.5	144649	35847.9		297056	72516.4		11401.2	57905.4
3	122054	382515	322126	158986	382238	122862	162538	224724	154104	308972	137896		54491.2	32549	34624.9		99029.5	79506.3	247432	187975	86943.8	125660		3	45292.3					193265								68910.3	189178	125996		276670				36401.3
Time	Ctrl_Cell2																							Time	NMIIA KD_Cell2
-1	52838.3	12259.6	98293.6	88537.8	59728	16622.1	56514.4	43158.7	2147.74	65004.8	96236.9	33342.9	65962	30131.8	11088	10528.4	43240.1	21723.1	20907	75192	26264.3	40550.9		-1	52247.6	80802.9	48692.1	30410	162536	77120.4	57748.6	176248	29671.8	31439.1	3760.01	28659	73838.9	15365.1	46245.8	50120.8	36584.9	41742.8	23284	11704.7	15219.4	24417	28603.8	8544.49
-0.5	50008	64635.1	90269.9	124411	77458.3	44837.7	93138.5	76630.1	25480.6	13106	46668.6	6485.23	75822.2	45927.5	11042.5	10559.5	49649.7	42463.7	38430.1	126751	24718.8	59590.3		-0.5	63270.1	38932.1	12997.3	25649	32477.4	62655.4	14818.8	35534	22768.1	45943.1	3203.46	26228.7	12845.8	25052.8	29135.1	46965.9	37823.3	39489.5	32632.4	10307.5	30029.9	12959.6	29549.9	9049.85
0	54062.6	29339.5	145650	121657	179705	50055.4	159196	106935	23951.5	164660	101600	68235.3	96419.4	42974.6	26883.9	52514.3	51187.9	50323.3	62616.9	159079	49877.1	58811.8		0	115459	48842.3	11916.4	76259.6	20711.6	89430.2	114262	95016.8	36252.7	48555.5	60946.9	43499.4	80192.3	40659.7	96449.6	53523.9	47747	81694.2	40015.3	21219.1	31119.8	19522.9	33344	26257.3
0.5	220173	88035.9	250273	179108	290874	139966	255466	98361.3	86439.4	229085	262537	169371	135406	62845.8	79527	114032	93513.4	52828.7	83289.5	182779	57336.1	96248.4		0.5	121034	85883.1	54985	39401.8	65890	114741			45993.6	32658.2	71878.6	74221.9	99102.2	70488	142581	163556	54530.8	191331	53797.1	35243.3	17140.2	34856	6368.57	66539.4
1	105090	138471	276638	256043	344779	128241	241595	106652	183431	207087	179710	152603	72796.9	74666.5	83599.5	46751.7	37612.6	82784.4	109254	211996	43581.3	133858		1	144149	118143			86042.4	90389.4			38483.1	17984.5		58988.4	103856	73527	130776	184546	46638.6	213247	72856.6	65047.8	11023.6	19575.5	32016.6	52759.3
1.5	117978	96882.4	284942	260608	282327	153093	174306	150900		108852		144235	70550.2	69198.2	101942	8344.23	84224.8	92027.8	48870.7	244670	26260.1	97942.1		1.5	62506.1	43358.9			89915.6	185452								63506.3	59811.3	162293		181471	76258.8	56528.7	23413.4	16681.1		63036.7
2	12063.6	169108	342933	211081	379123	213481	290933	182116	137956	153327	189038		63067.2	73056.6	102937		97493.3	102992	69666.9	221430	120432	81768.1		2	124395				164310	119684								85880.9	76440.7	65691.3		195149	68505.9		15400.8	46577.1
2.5	69872.1	94864.2	333195	149685	399500	293866	249066	273952	146784	294280	166904		42920.3	163454	58657.4		81458.9	37329.5	147131	165606	137190	149980		2.5	43097.8				110214	141501								67072.7	123509	57477.8		206128	89980.8		21839.1	51317.2
3	86412.4	141108	246826	162128	238704		202215	188047	160600	277873	187166		42492.9	41708.7	51899.2		59116.6	43821.8	80369.2	194165	77056.9	157489		3	63338.1					131255								65532.9	174196	56098.3		227148				49682.6
[truncated: 28 more columns]

## Sheet: Fig6_c
Fig6_c
Time	Ctrl
-30	67303.3	34507.6	106537	8195.34	139425	23503.5	67215.7	47227.6	82321.5	31221.5	78567.9	50008	64635.1	90269.9	124411	77458.3	44837.7	93138.5	76630.1	25480.6	13106	46668.6	6485.23	67016.1	30544.8	25736.8	39698.7	25213.2	40793.2	124273	98424.6	121066	6365.15	75822.2	45927.5	11042.5	10559.5	49649.7	42463.7	38430.1	126751	24718.8	59590.3
0	99027.5	36196.6	158053	58937	166506	27024.1	130954	35780.4	34498	52125.5	76857	54062.6	29339.5	145650	121657	179705	50055.4	159196	106935	23951.5	164660	101600	68235.3	80189.1	33255.8	76376.3	79539.4	24861.7	51270.6	125841	99621.1	89094.2	12650	96419.4	42974.6	26883.9	52514.3	51187.9	50323.3	62616.9	159079	49877.1	58811.8
30	260872	127617	215461	128641	240483	161736	224544	104170	70351.1	122908	138656	220173	88035.9	250273	179108	290874	139966	255466	98361.3	86439.4	229085	262537	169371	98938.3	96666	88567.9	150370	53470.2	69623.3	150934	112794	84924.3	41912	135406	62845.8	79527	114032	93513.4	52828.7	83289.5	182779	57336.1	96248.4
Time	NMIIA KD
-30	74731.5	94267.6	48631.8	22989.1	37169.2	50124.2	61876.1	7976.3	6217.19	27389.1	20000.8	27391.6	70334.5	62632.6	69141.4	70704.9	63270.1	38932.1	12997.3	25649	32477.4	62655.4	22768.1	45943.1	3203.46	26228.7	12845.8	25052.8	29135.1	46965.9	37823.3	39489.5	32716.5	5812.53	10311.8	14002.9	27863.9	19139.2	32632.4	10307.5	30029.9	12959.6	29549.9	9049.85
0	108567	210021	80131.1	66824.2	235879	122564	61121.7	20591.8	43131.2	22397.4	96765.4	42785.1	106098	84339.9	78076.3	93770.7	115459	48842.3	11916.4	76259.6	20711.6	89430.2	36252.7	48555.5	60946.9	43499.4	80192.3	40659.7	96449.6	53523.9	47747	81694.2	36214.3	23965.5	13093.6	15387.4	9178.97	41170.1	40015.3	21219.1	31119.8	19522.9	33344	26257.3
30	100130	251478	144884	46507.8	75218.5	100850	55245.5	4143.56	94364	36017.6	61066.2	53711.1	235062	204872	76819	168220	121034	85883.1	54985	39401.8	65890	114741	45993.6	32658.2	71878.6	74221.9	99102.2	70488	142581	163556	54530.8	191331	55555.4	52641.7	27449.5	47919.6	31794.4	90498.8	53797.1	35243.3	17140.2	34856	6368.57	66539.4
Time	NMIIB KD
-30	41355.1	24471.2	14452.2	52829.2	29255.8	47324.6	110974	189714	76743.2	86164.1	22736.9	47987.4	68110.6	56552.4	44644.5	35239.7	43701.1	2940.67	5896.27	22625.6	74450.6	5802.58	82668	74123.6	31642.2	49224.4	62507.5	24474.8	103932	75861.2	26360.6	38288.2	22724	41340.8	41740	26515.4	17922.6	70489.2	43795.4	6873.23	7933.42	30332.6	31245.1	35907.3	28072.4	3782.69	4180.84	82439.8	43750.3
0	56242.7	73570.3	41921.2	91777.1	173776	108093	159148	205454	79345.5	147302	220298	199268	129907	41945.5	61778.1	31151	47434.4	98018.6	27871.5	37270.8	70964.8	162250	104658	130094	69177.7	38981.3	42604.3	184108	468464	98145.8	20484	60122.6	31923.7	44387.4	79813.6	35929.5	46301.9	77514.7	42227.2	79481.8	17439.7	53010.8	53669.7	28543.5	42830.6	25679.7	83820.7	63938.8	21646.1
30	43752.2	228154	42517.4	97755.6	197871	289697	239301	145126	126776	265204	356576	122764	295501	89118.2	106761	142202	62768.5	71208.5	165772	83696.2	71037.1	235141	185517	172272	98850.7	88030.1	204703	324165	172569	308182	90686.9	107919	153562	70781.3	34122.5	47638.7	36603	149934	138586	150940	17236.2	73236.6	151048	105309	54621.1	83911.8	44372.1	136569	151462
[truncated: 3 more columns]

## Sheet: Fig6_d
Fig6_d
Ctrl_Parallel	Ctrl_Perp	NMIIA KD_Parallel	NMIIA KD_Perp	NMIIB KD_Parallel	NMIIB KD_Perp
2899.65	3911.95	2090.63	-224.929	898.11	1377.24
3545.22	2462.65	398.693	1893.06	1429.3	2519.19
3524.18	2351.09	532.833	1029.64	1715.63	1294.18
3348	1267.31	634.537	1989.12	1853.88	555.663
4810.17	1214.93	1657.82	495.055	936.882	1307.26
4195.06	1359.54	920.69	1100.36	1273.22	627.602
3943.66	481.176	4800.99	2432.52	2308.89	2290.67
1820.17	2873.38	4721.11	2860.57	359.168	4968.11
2281.93	2561.69	5324.59	200.738	778.24	4199.85
4365.44	366.909	1376.75	2797.62	1251.63	4403.61
1607.55	2533.03	1158.8	2979.61	4726.89	308.585
-373.821	4408.42	50.5093	2349.71	1060.09	2940
4335.76	3164.01	3883.41	484.045	2803.2	711.463
4052.51	2216.02	629.646	910.897	1201.93	2075.8
4274.9	1996.84	219.43	1539.79	4847.48	-82.5024
4400.26	1448.41	526.379	1271.61	2775.43	2143.62
4609.84	1554.19	335.925	2053.53	1591.24	16.9801
5477.09	1646.66	175.281	1581.85	2009.58	1853.59
3587.84	3478.22	2720.07	1414.41	1901.64	1180.17
883.413	4699.05	976.493	1926.98	3731.34	1347.03
1559.76	4754.88	1037.57	1235.01	1780.36	1754.68
4238.49	2503.66	545.894	1384.53	2928.16	1180.93
5252.29	1557.17	582.758	1352.6	2857.95	2372.31
4234.38	1683.27	1480.15	2332.54	2278.64	2939.58
1920.51	5832.78	1686.37	999.837	3243.3	1491.66
2816.35	4412.75	1592.91	1380.27	3927.48	1953.37
1794.94	5011.91	979.904	1854.59	2592.63	2797.93
2560.56	5585.13	1550.53	2264.68	2137.61	3149.57
3563.53	4409.78	957.987	2740.55	4179.34	2312.26
1907.14	4788.58	1952.31	992.055	4905.23	1302.57
834.891	2866.97	1844.47	813.087	5051.16	1521.26
2771.28	1386.9	1090.08	1154.09	6744.3	35.1501
1487.06	1753.77	413.259	1315.84	5320.77	1529.78
2059.87	455.77	1207.73	448.848	1663.64	5368.36
290.544	2723.09	419.694	349.787	1218.5	4269.05
1752.02	1234.9	4396.46	592.458	2423.79	3847.77
3081.71	3295.03	980.73	740.911	2251.49	5006.57
2457.15	2965.57	-2096.91	1353.28	2759.51	4649.73
1984.18	2010.66	3496.98	1309.7	3286.6	3987.57
3644.11	2097.22	3526.49	537.695	3751.02	3722.75
2470.07	4218.65	697.499	1046.93	3296.45	1228.05
2271.99	2581.95	409.63	1631.85	3020.36	2058.29
3037.39	1342.44	177.643	1375.72	2519.67	1268.49
3058.85	901.468	1111.97	708.378	971.106	2101.83
2270.17	2607.02	667.029	1124.01	1433.39	379.691
1695.74	3473.5	591.108	1317.4	1264.95	2016.71
3931.83	3209.39	2009.89	1668.36	967.008	1695.37
3072.46	2780.93	1675.87	1814.61	813.667	518.476
2003.5	467.398	1655.61	647.49	4211.44	2049.86
2210.93	2537.22	1874.98	1225.37	3168.13	1788.57
3641.45	1043.1	1551.52	1886.51	5956.18	3092.41
3609.03	2012.96	564.422	2861.99	3611.36	2469.25
1656.52	2836.41	2110.66	3437.17	3323.76	2504.87
2812.17	2228.39	1999.1	3304.64	3483.38	2736.08
4503.86	3737.51	3050.56	2986.72	2994.47	4264.17
3702.28	1793.15	5308.39	1274.72	1795.18	3990.57
2880.53	722.444	5401.42	385.93	2345.94	2977.65
3385.66	1420.24	4537.47	1682.97	1813.35	5949.85
4408.05	2012.18	1101.03	1435.45	4642.07	2495.11
5080.48	1923.36	1752.18	541.612	3324.04	5390.78
2651.55	2577.09	1193.28	4204.74	5788.36	4076.67
4202.2	1117.97	1401.14	4697.94	5400.54	1929.38
4611.9	1829.76	2236.55	4172.1	-241.681	7371.88
4599.34	1872.63	2701.14	4248.59	2872.62	5812.6
5303.78	1104.42	3389.55	4343.99	-855.324	8938.15
4314.38	2212.82	2079.84	5522.52	-59.9596	8441.73
4351.48	1520.84	1146.98	1199.6	-880.808	9415.72
1112.73	3419.83	781.77	1438.49	395.762	8522.17
-198.726	4424.5	1034	1408.72	1481.81	2139.45
4795.43	-1003.68	1089.48	1382.82	2436.11	1926.55
6360.6	-1436.1	1092.02	1930.07	2423.09	1828.17
6015.64	-1291.35	665.909	1159.58	2541.82	1378.51
6158.34	283.082	1230.58	1190.7	881.06	2440.04
8156.07	-1100.78	1125.98	1303.29	1448.23	1602.73
-488.253	3936.91	916.972	256.944	-143.873	2445.91
2927.27	-87.2966	696.496	461.44	3076.52	1421.53
1301.12	2424.82	478.361	466.345	673.522	1779.43
-1877.03	5161.74	821.565	229.049	615.787	2250.79
-586.677	5748.59	1081.99	394.027	2837.68	2241.42
3701.05	286.706	469.299	782.844	2775.43	1528.17
2248.47	2605.72	675.147	360.253	1052.16	274.915
2377.59	2670.74	1266.5	307.409	723.475	906.793
1349.23	3923.84	702.02	1312.77	3735	45.4323
3868.99	1507.73	564.702	1185.13	-505.649	1968.09
4174.01	1388.86	657.826	1048.34	5963.35	46.5999
1065.45	3069	-96.5392	323.783	3989.26	2824.84
2025.19	3346.2	492.787	99.6589	5226.56	1987.54
4042.82	680.076	2199.65	1087.85	4274.48	2294.38
4191.29	260.866	3057.85	142.375	2549.54	4075.98
3880.95	1158.77	3177.59	-462.692	3948.55	2832.55
5496.64	313.385			2772.39	1304.57
3197.04	1303.05			1021.11	2724.05
1667.61	3226.92			3413.05	3481.06
2879.78	2013.08			1760.48	3588.82
4053.99	1405.26			2750.04	3406.91
4113.07	1519.42			2391.6	2035.47
2845.97	2632.17			1590.62	1731.91
2051.73	2617.68			1449.24	2343.66
1483.12	3348.48			1264.71	2858.57
3558.42	808.053			288.546	993.338
2635.08	1184.15			1057.62	3018.01
1740.26	2720.78			2057.21	1215.62
1459.25	3186.26			3615.19	1650.17
2252.14	3063.54			588.64	2097.87
5903.09	-550.051			-233.725	3699.58
1221.68	3705.05			2898.98	879.758
-1890.87	7263.19			2229.24	474.073
6377.72	3092.74			384.286	1399.7
4762.94	4353.84			1023.09	5112.16
4815.79	5245.72			7537.38	-405.325
5588.98	5048.86			7471.53	154.84
5772.67	4242.49			7233.68	-297.574
5869.95	3931.77			5391.63	556.765
138.575	-308.303			6042.78	444.877
2431.99	-1064.06			3801.92	2985.63
1263.96	215.764			2876.92	1421.67
2185.01	1695.18			4196.41	532.725
148.393	924.512			1514.46	1510.37
-334.279	627.931			811.052	5078.48
1891.55	2055.39			2664.36	1964.56
4566.82	688.89			1787.59	3010.8
5859.62	-271.254			2918.46	2371.13
5358.9	-60.7572			4522.8	696.25
5309.2	247.675			6220.4	262.855
6177.2	76.3657			7341.06	-1088.36
				489.797	-81.4327
				1538.75	-35.4978
				-80.1034	3437.3
				-284.334	2023.59
				4718.04	220.747
				2251.05	3640.55
				2244.96	782.884
				285.869	3121.85
				4661.23	53.2103
				2523.59	1221.44
				541.598	1768.47
				-376.623	-288.623
				3544.01	2442.18
				5155.52	1988.52
				6870.72	694.2
				7163.85	163.362
				5986.08	908.83
				3323.57	2716.62
				1898.69	2679.2
				1106.29	3763.79
				1669.4	4701.65
				1697.64	6038.15
				4943.03	3221.59
				8265.84	-153.872
