# Supplementary figures and images for: Myosin II isoforms play distinct roles in adherens junction biogenesis
Source: eLife journal article supplement (doi:10.7554/elife.46599), 2019-09-05

Figure 1—figure supplement 1

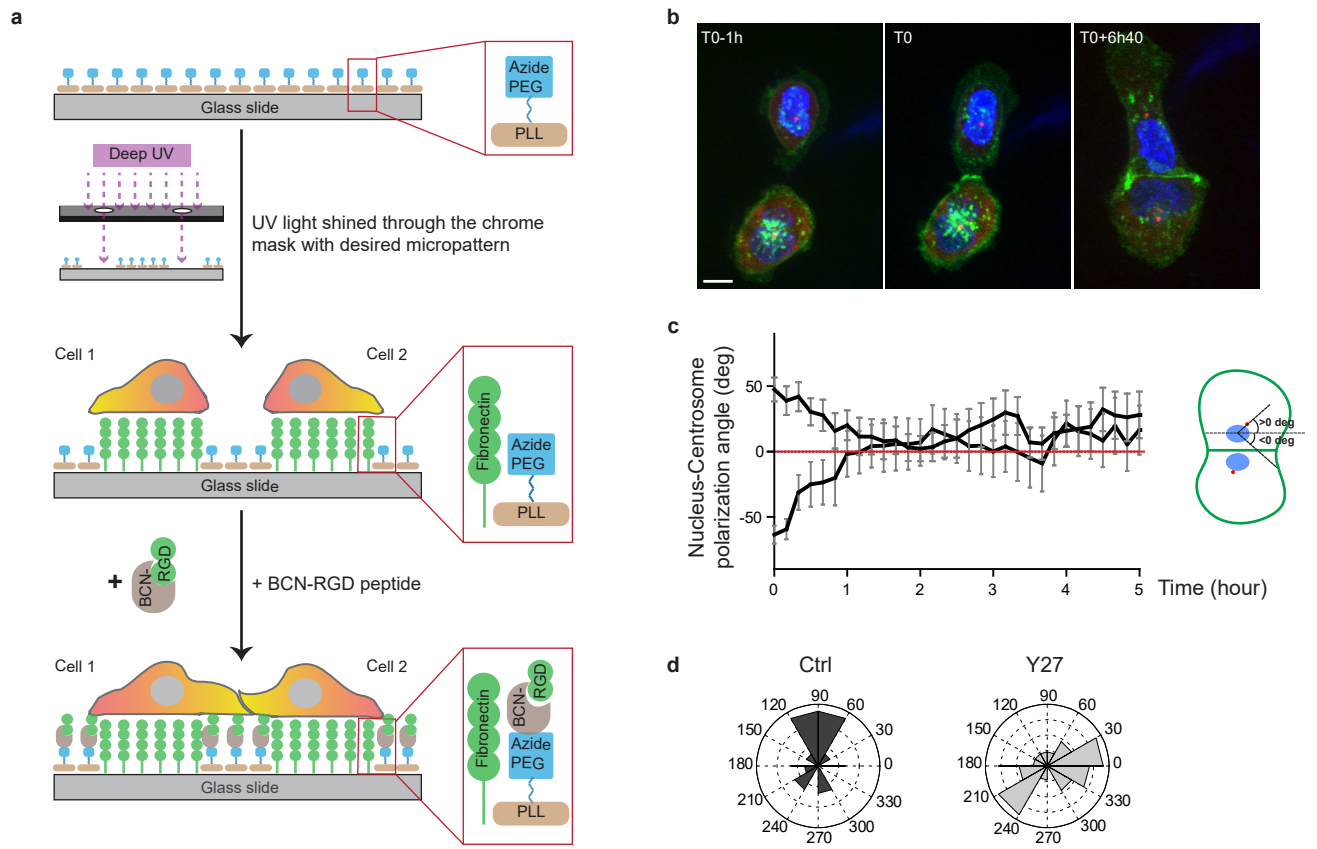

Supplement: supp [file elife-46599-supp-v1.zip]

Figure 2—figure supplement 1

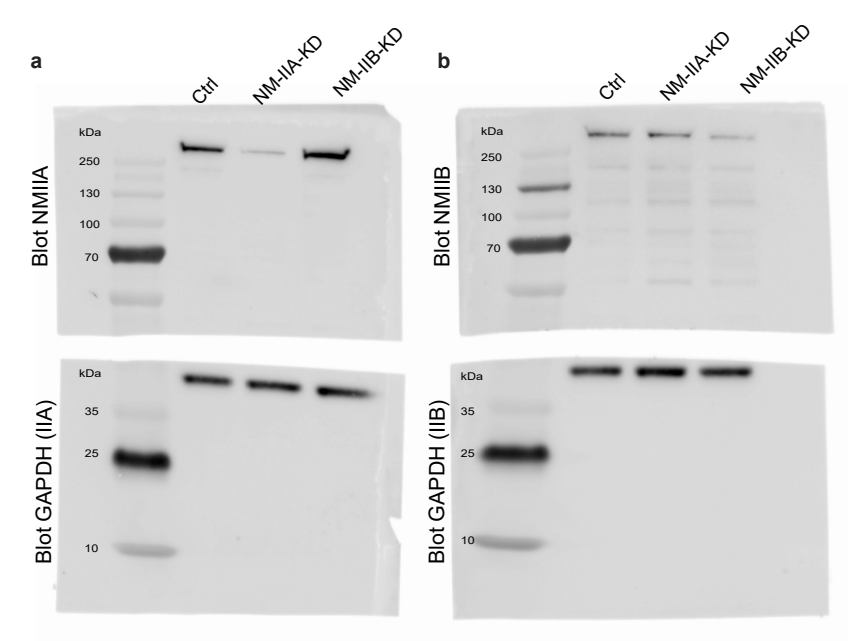

Supplement: supp [file elife-46599-supp-v1.zip]

Figure 5—figure supplement 1

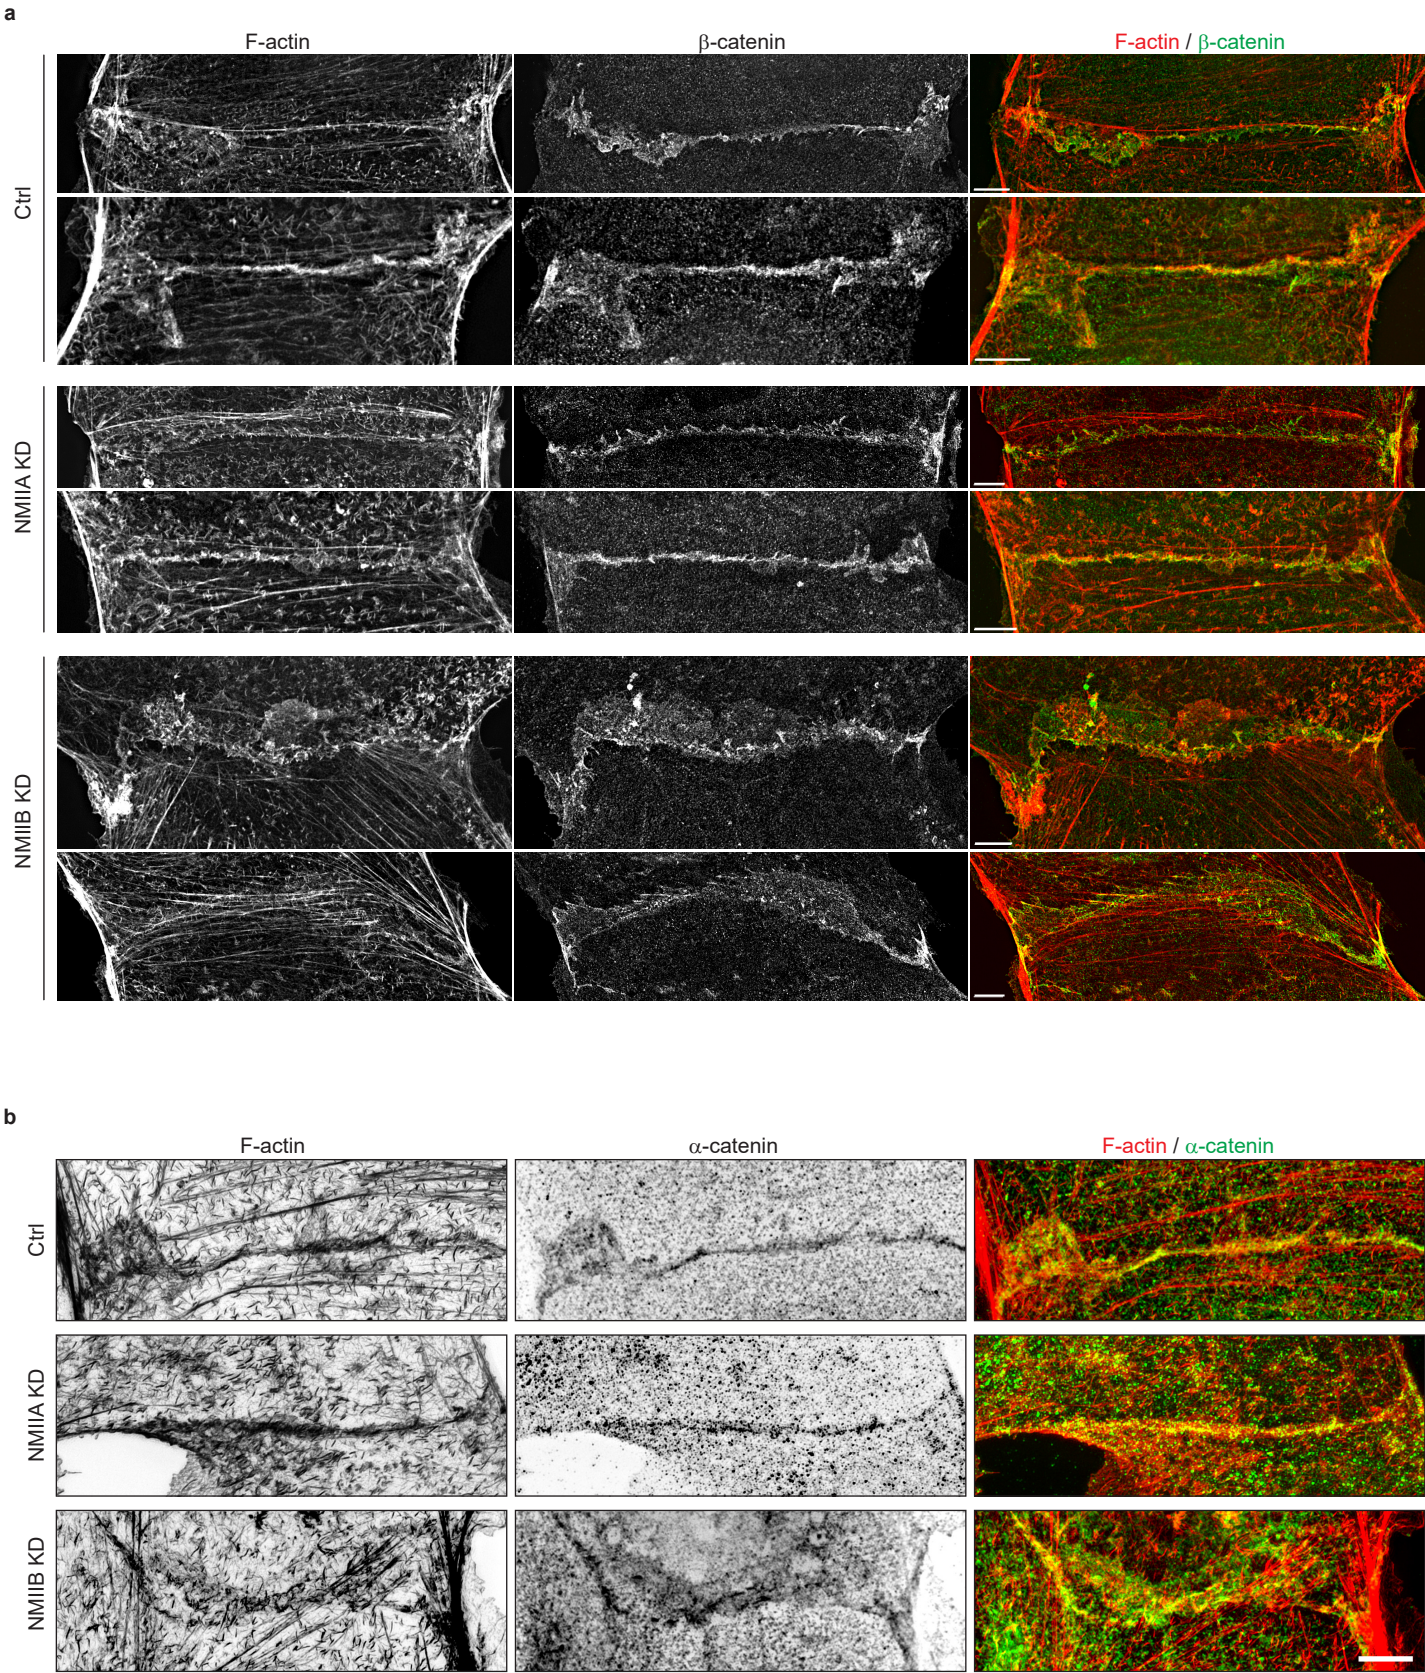

Supplement: supp [file elife-46599-supp-v1.zip]

Figure 6—figure supplement 1

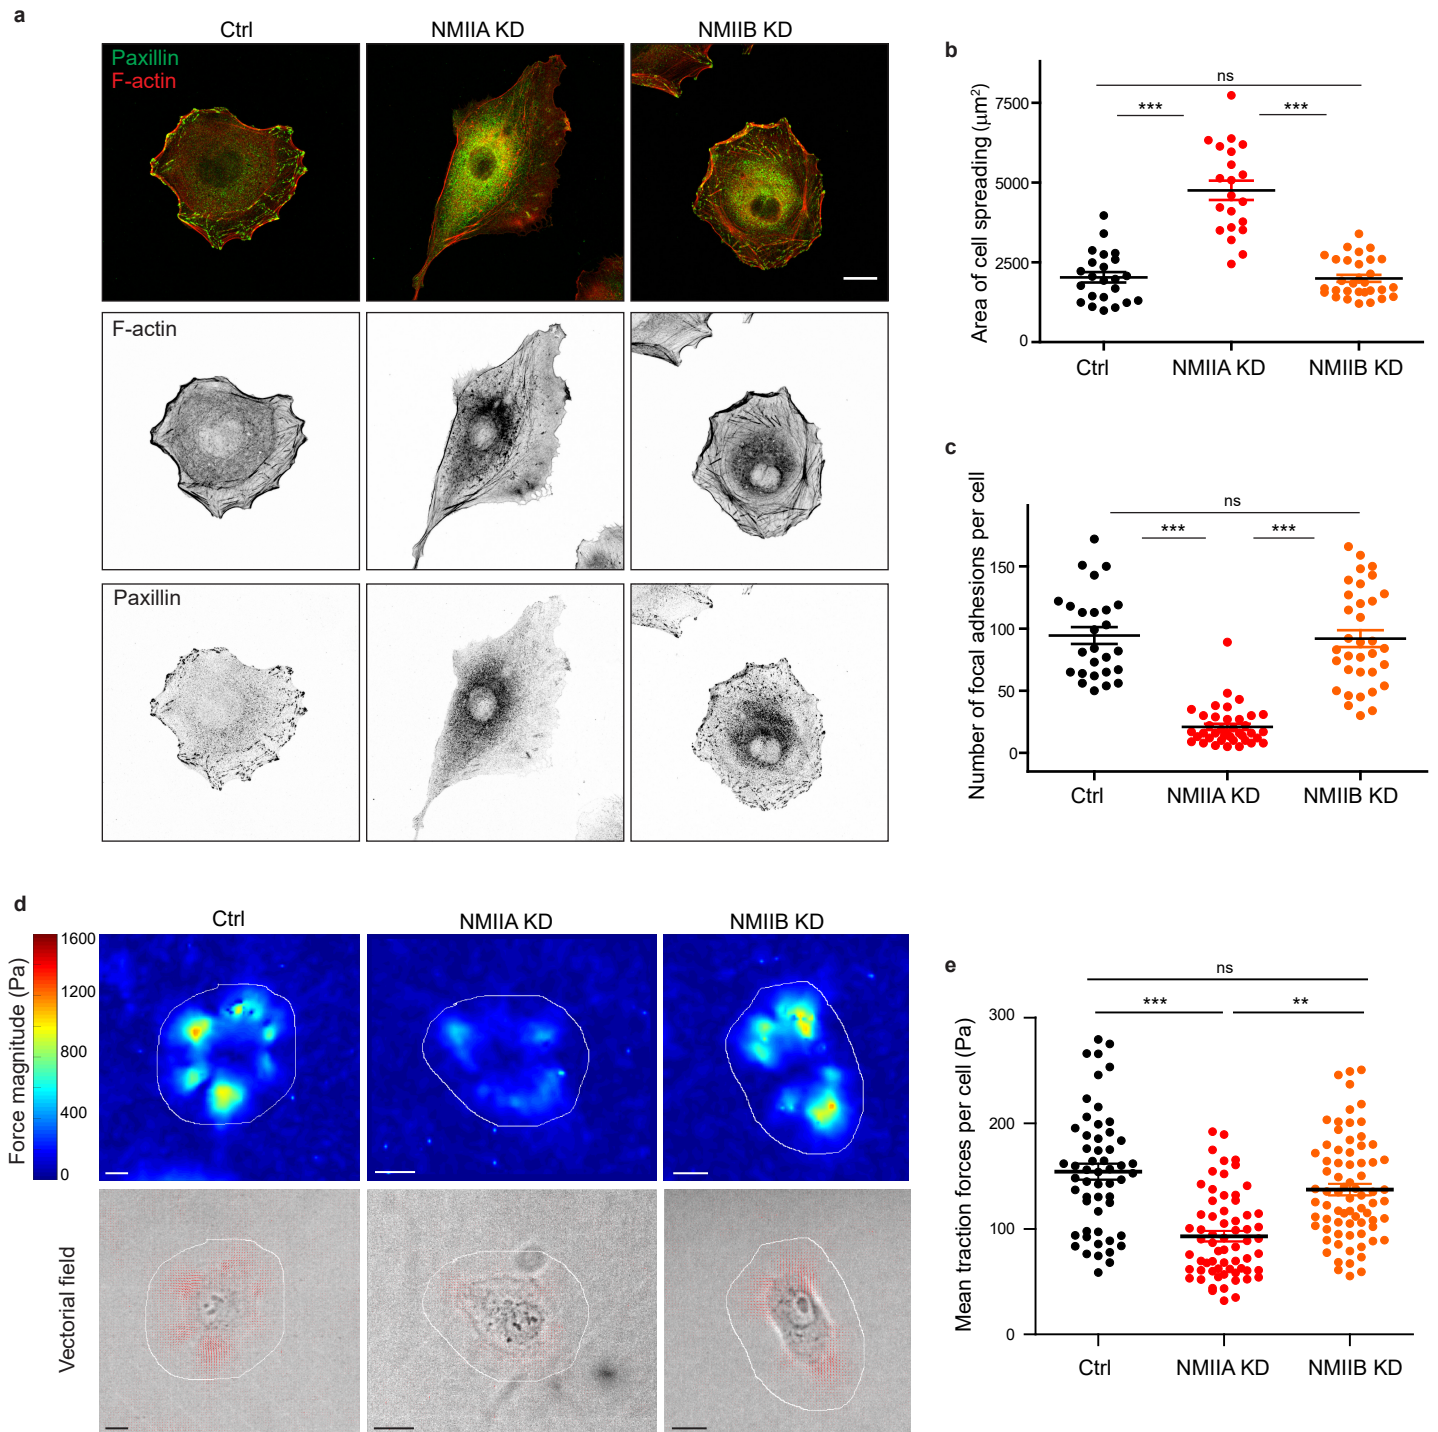

Supplement: supp [file elife-46599-supp-v1.zip]

Figure 6—figure supplement 3

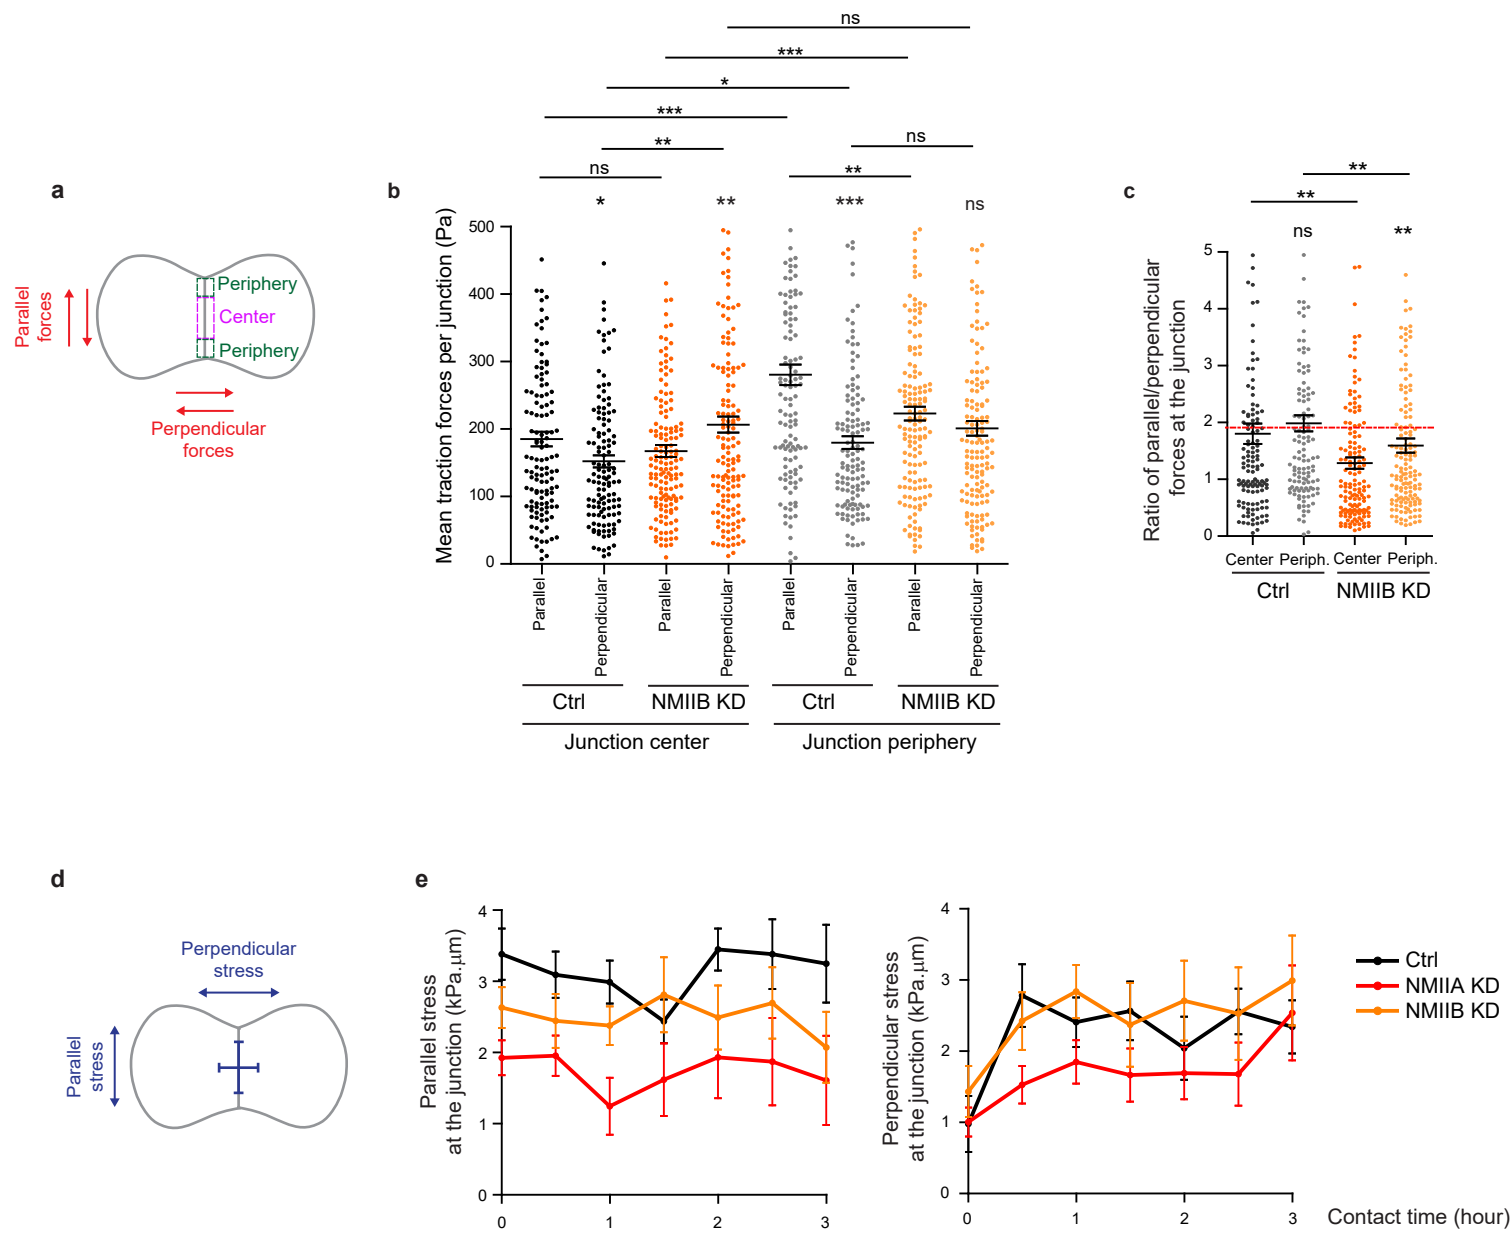

Supplement: supp [file elife-46599-supp-v1.zip]

Figure 3—figure supplement 1

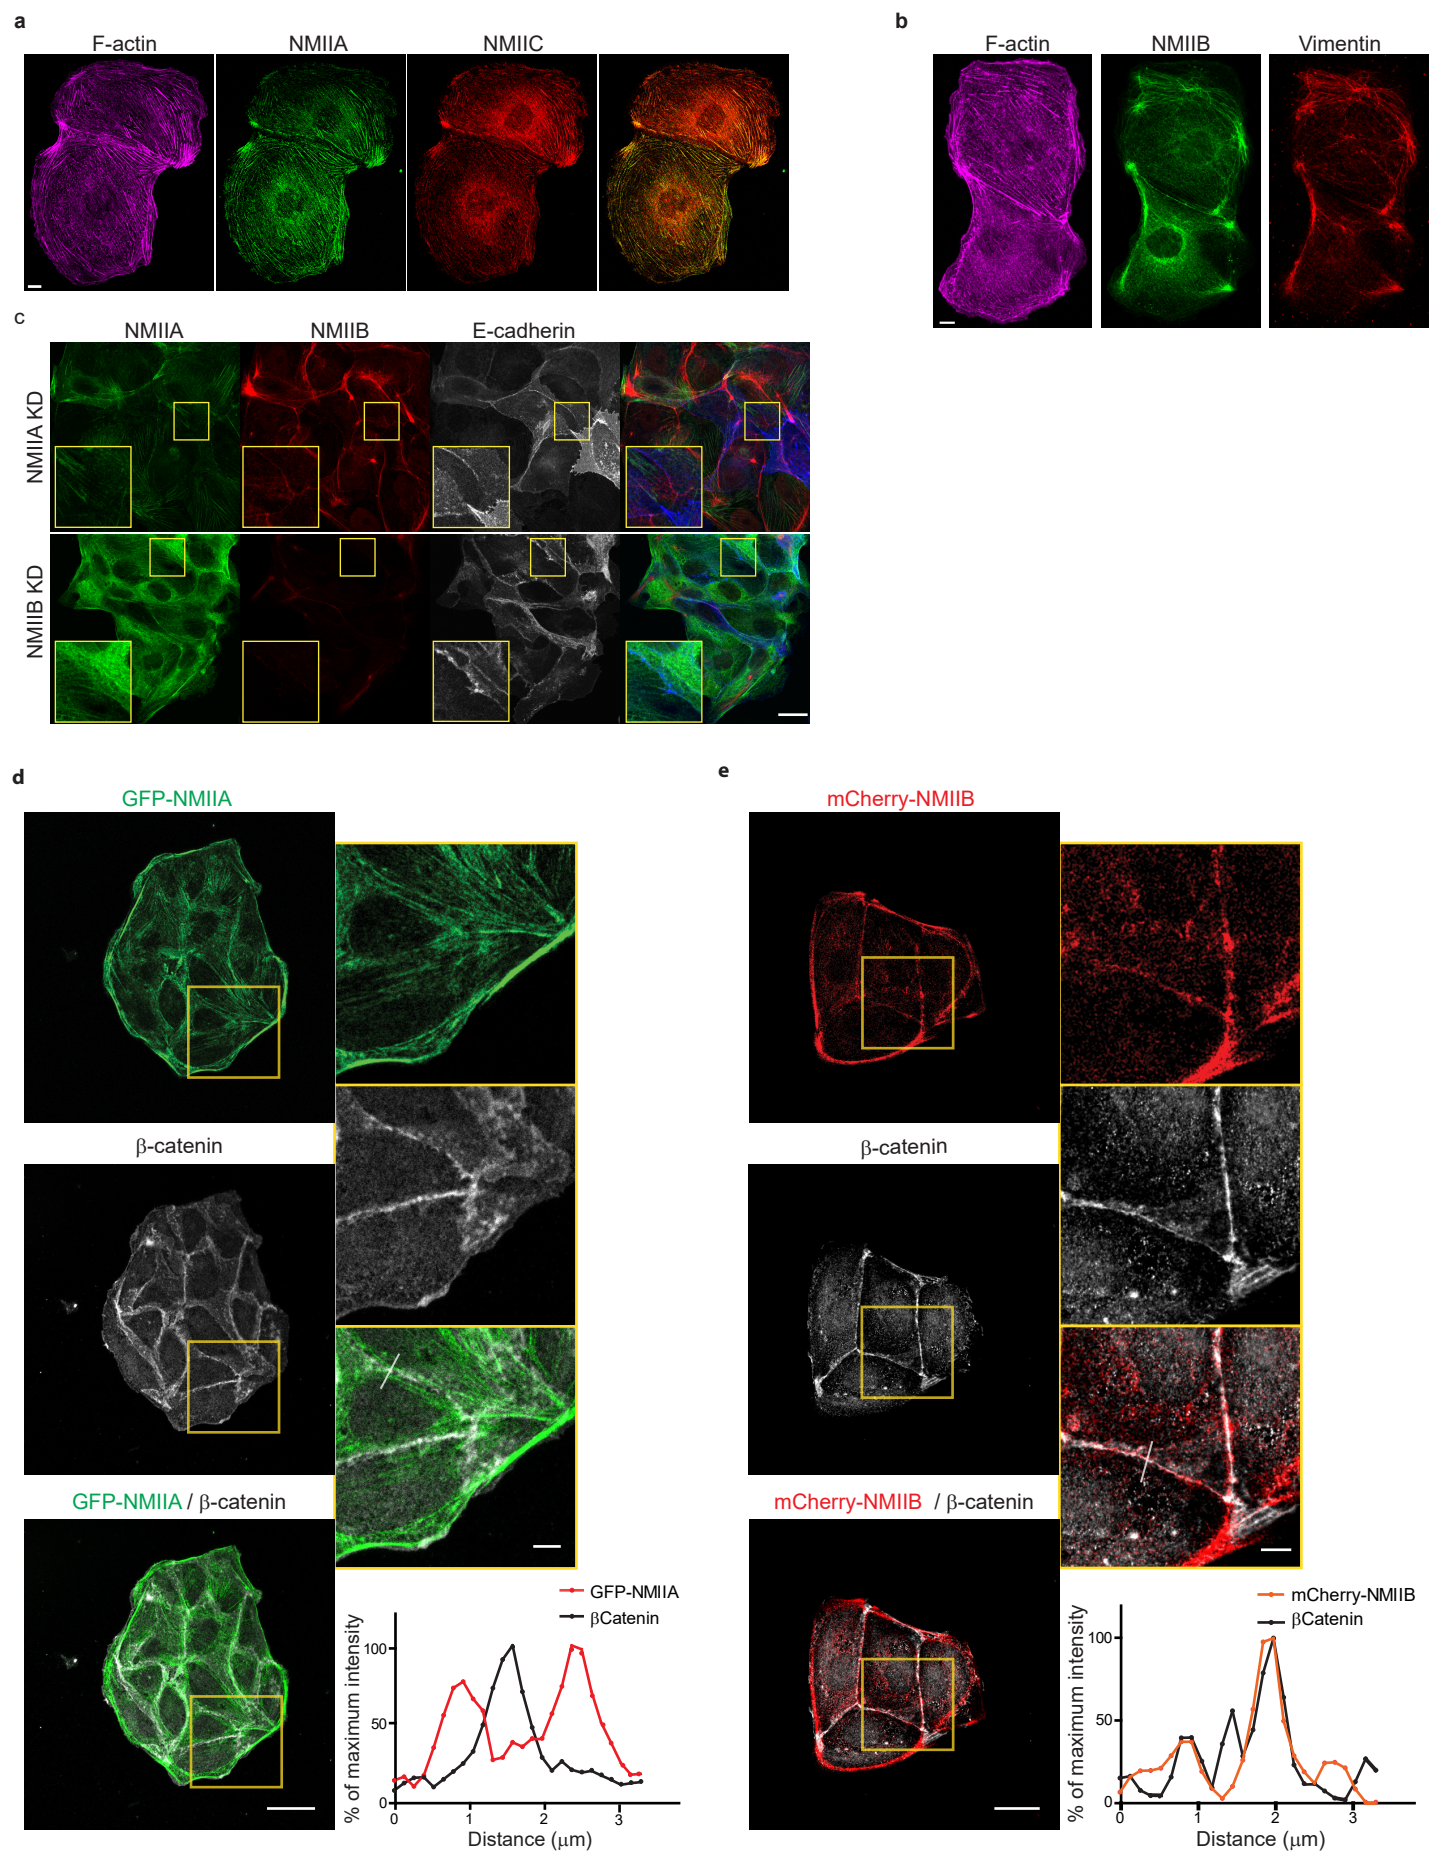

Supplement: supp [file elife-46599-supp-v1.zip]

Figure 6—figure supplement 2

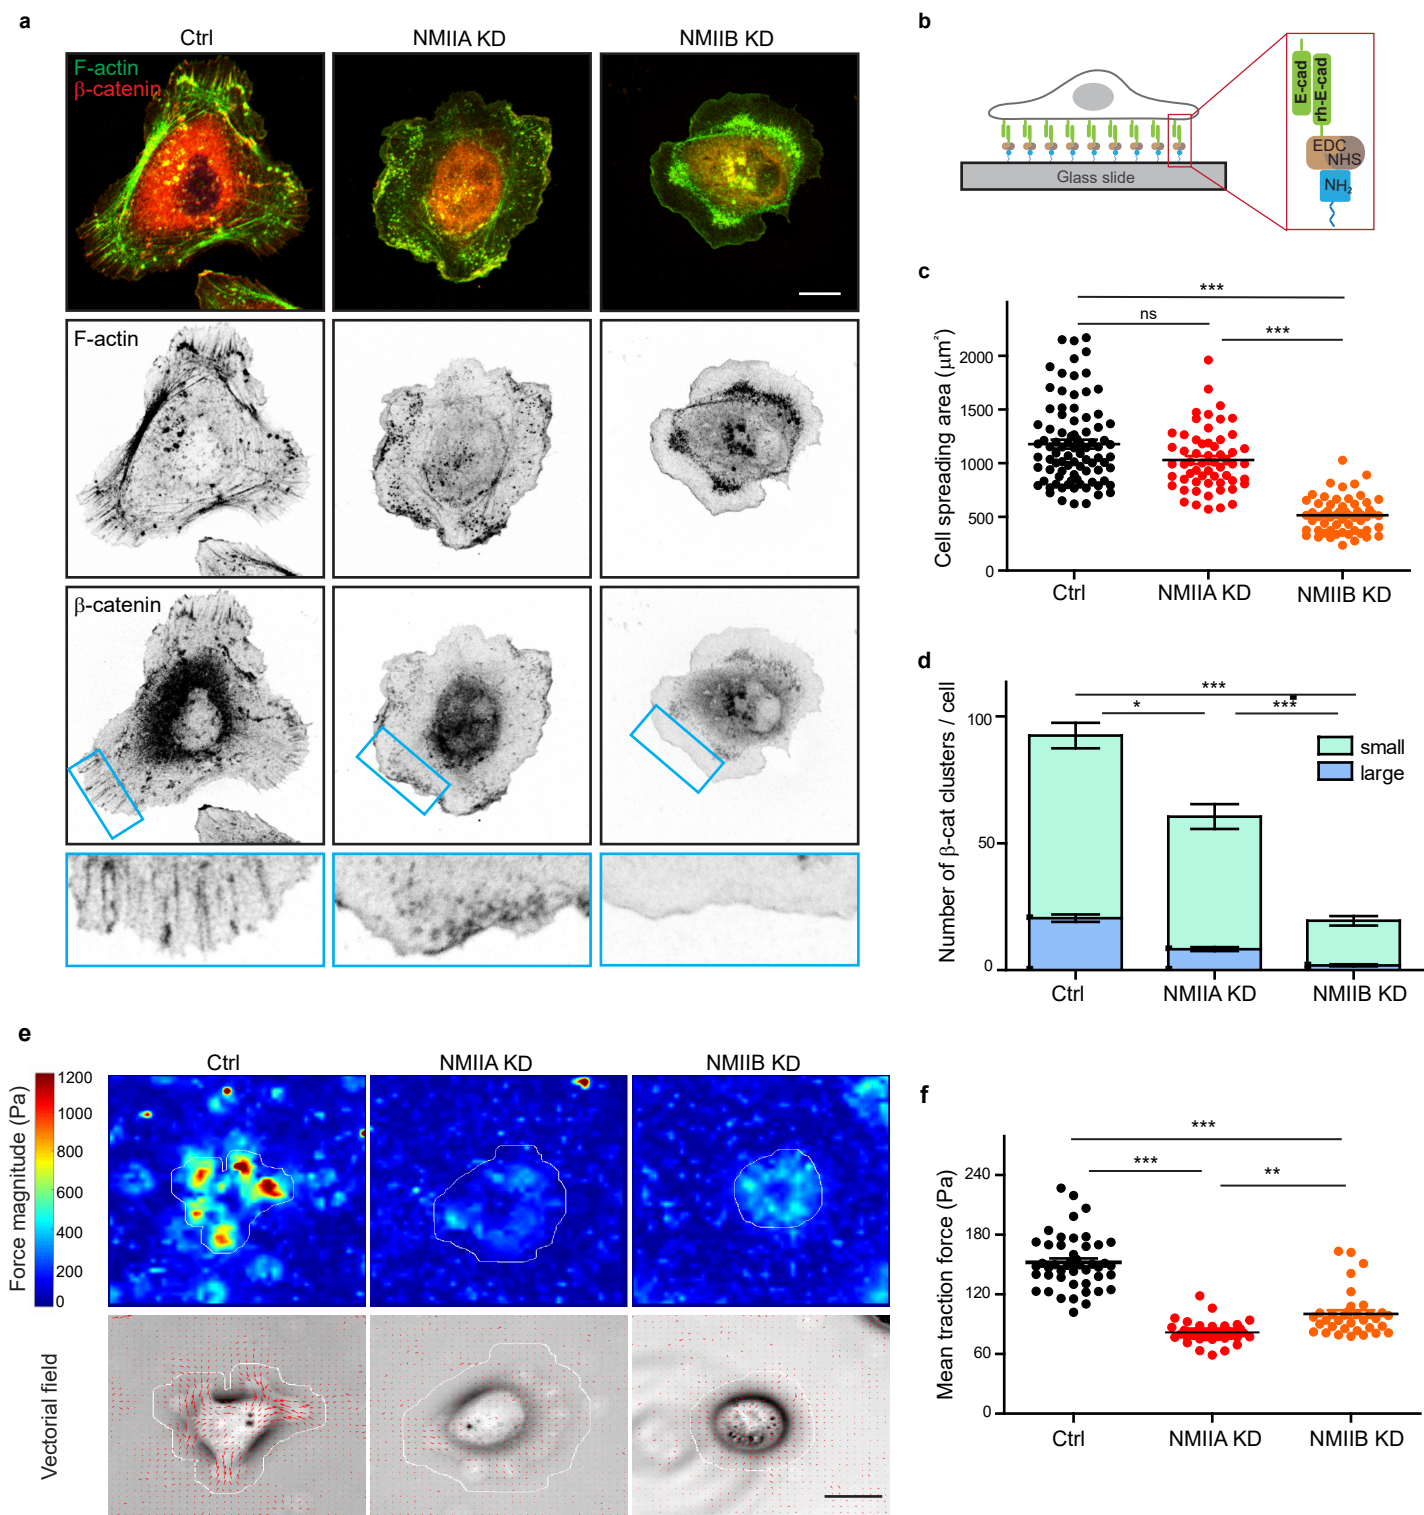

Supplement: supp [file elife-46599-supp-v1.zip]

Figure 3—figure supplement 2

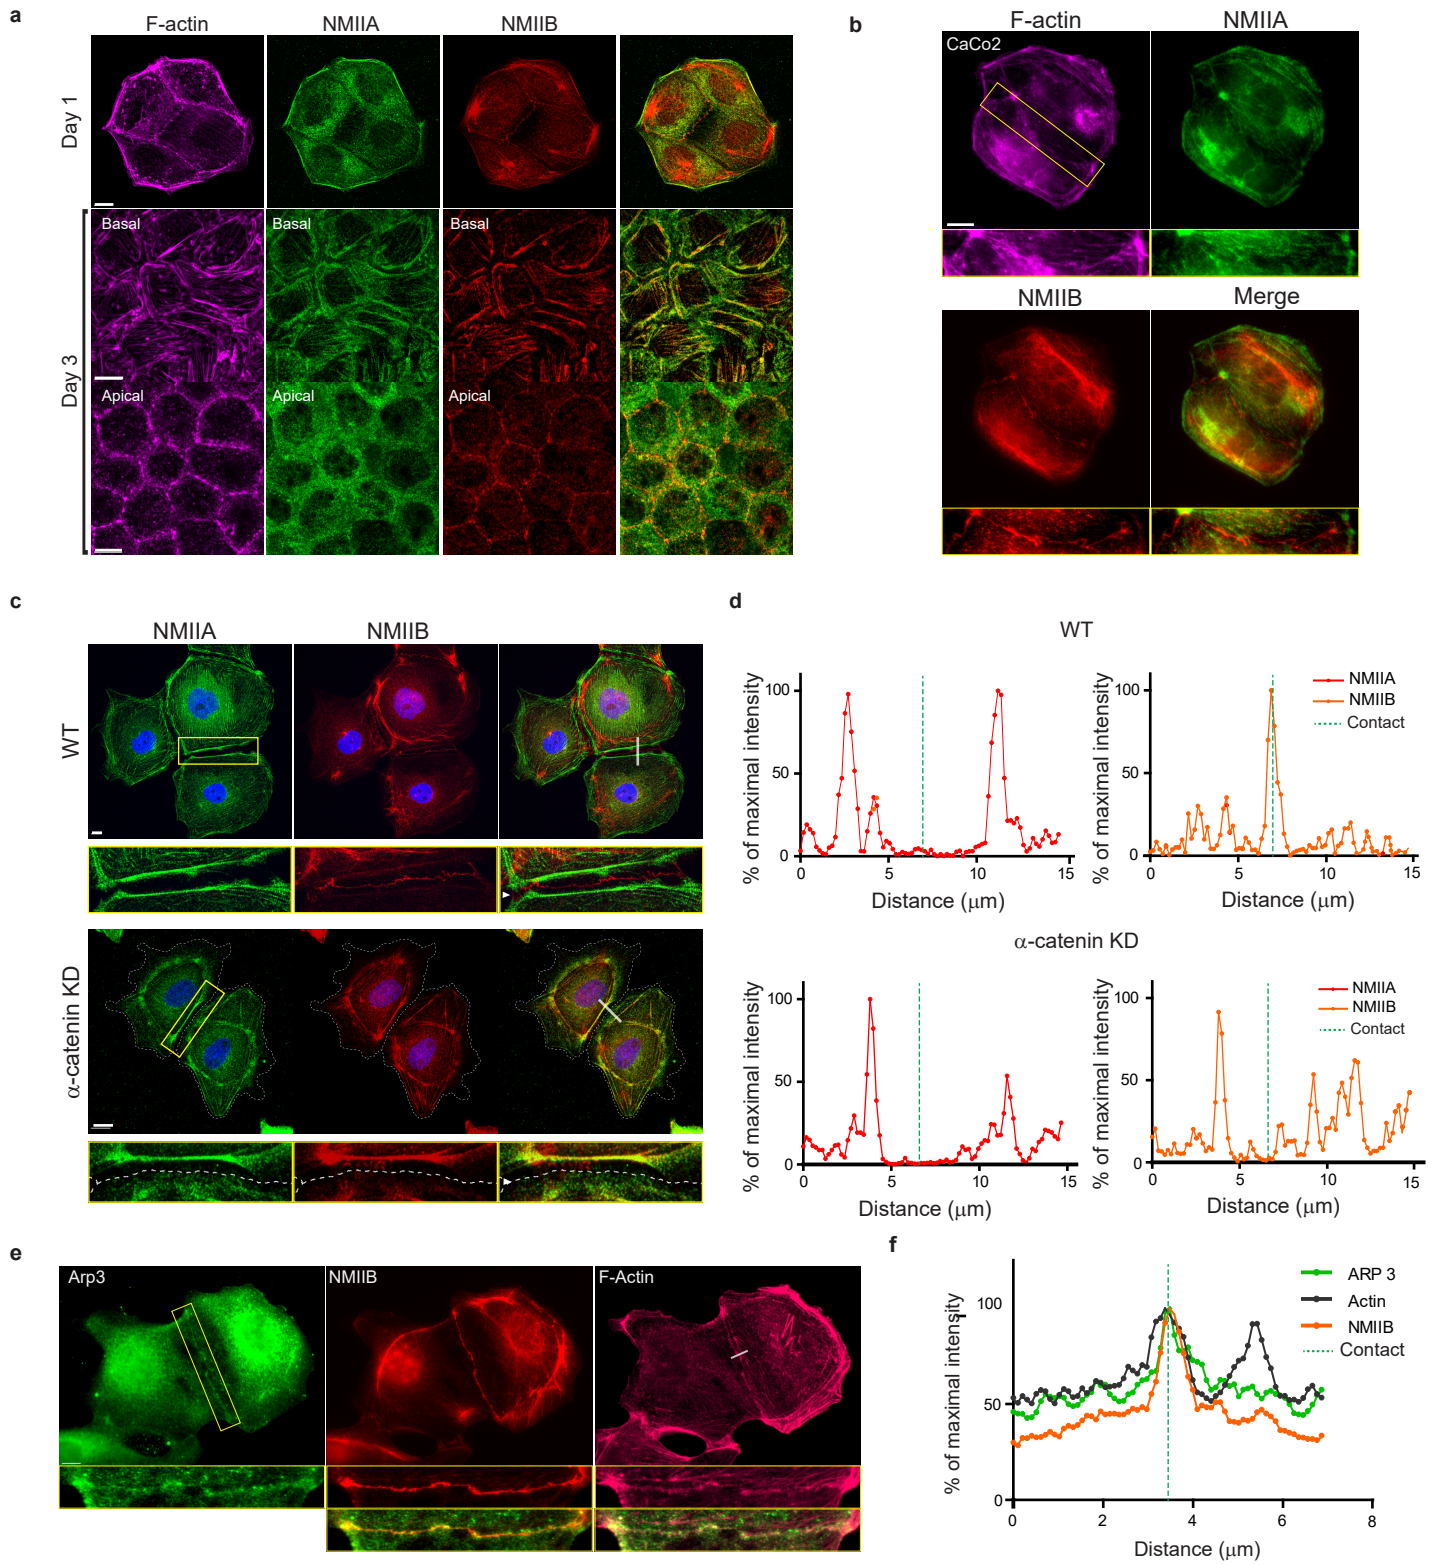

Supplement: supp [file elife-46599-supp-v1.zip]
